## 1 **Coordinated differentiation of human intestinal organoids with functional enteric neurons** 2 **and vasculature.**

3  
4 Charlie J. Childs<sup>1,2</sup>, Holly M. Poling<sup>3,4</sup>, Kevin Chen<sup>5</sup>, Yu-Hwai Tsai<sup>6</sup>, Angeline Wu<sup>6</sup>, Caden W.  
5 Sweet<sup>6</sup>, Abigail Vallie<sup>7</sup>, Madeline K. Eiken<sup>8</sup>, Sha Huang<sup>6</sup>, Ryan Schreiner<sup>5,9</sup>, Zhiwei Xiao<sup>6</sup>,  
6 Ansley S. Conchola<sup>7</sup>, Meghan F. Anderman<sup>6</sup>, Emily M. Holloway<sup>1</sup>, Akaljot Singh<sup>3,10</sup>, Roman  
7 Giger<sup>1,11</sup>, Maxime M. Mahe<sup>3,12</sup>, Katherine D. Walton<sup>6</sup>, Claudia Loebel<sup>8,13</sup>, Michael A.  
8 Helmrath<sup>3,10</sup>, Shahin Rafii<sup>5</sup>, Jason R. Spence<sup>1,6,7,8</sup>

9  
10 1 - Department of Cell and Developmental Biology, University of Michigan Medical School, Ann  
11 Arbor, Michigan, USA.

12 2 - Department of Computational Medicine and Bioinformatics, University of Michigan Medical  
13 School, Ann Arbor, Michigan, USA.

14 3 - Center for Stem Cell and Organoid Medicine (CuSTOM), Cincinnati Children's Hospital  
15 Medical Center, Cincinnati, OH, USA

16 4 - Department of Biomedical Engineering, University of Cincinnati College of Engineering and  
17 Applied Science, Cincinnati, OH, USA

18 5 – Hartman Institute for Therapeutic Organ Regeneration, Division of Regenerative Medicine,  
19 Ansary Stem Cell Institute, Department of Medicine, Weill Cornell Medicine, New York, NY,  
20 USA.

21 6 – Division of Gastroenterology and Hepatology, Department of Internal Medicine, University of  
22 Michigan Medical School, Ann Arbor, Michigan, USA.

23 7 - Graduate Program in Cellular and Molecular Biology, University of Michigan Medical School,  
24 Ann Arbor, Michigan, USA.

25 8 - Department of Biomedical Engineering, University of Michigan and University of Michigan  
26 College of Engineering, Ann Arbor, Michigan, USA.

27 9 - Department of Ophthalmology, Margaret Dyson Vision Research Institute, Weill Cornell  
28 Medicine, New York, NY, USA.

29 10 - Division of Pediatric General and Thoracic Surgery, Cincinnati Children's Hospital Medical  
30 Center, Cincinnati, OH 45229, USA.

31 11 - Department of Neurology, University of Michigan Medical School, Ann Arbor, Michigan,  
32 USA.

33 12 - Université de Nantes, INSERM, TENS, The Enteric Nervous System in Gut and Brain  
34 Diseases, IMAD, Nantes, France.

35 13 - Department of Materials Science and Engineering, University of Michigan College of  
36 Engineering, Ann Arbor, Michigan, USA.

### 37 38 **Abstract**

39 Human intestinal organoids (HIOs) derived from human pluripotent stem cells co-differentiate  
40 both epithelial and mesenchymal lineages *in vitro* but lack important cell types such as neurons,  
41 endothelial cells, and smooth muscle. Here, we report an *in vitro* method to derive HIOs with  
42 epithelium, mesenchyme, enteric neuroglial populations, endothelial cells, and organized  
43 smooth muscle in a single differentiation, without the need for co-culture. When transplanted  
44 into a murine host, these populations expand and organize to support organoid maturation and  
45 function. Functional experiments demonstrate enteric nervous system function, with HIOs  
46 undergoing peristaltic-like contractions, suggesting the development of a functional  
47 neuromuscular unit. HIOs also form functional vasculature, demonstrated *in vitro* using  
48 microfluidic devices to introduce vascular-like flow, and *in vivo* following transplantation, where  
49 HIO endothelial cells anastomose with host vasculature. Collectively, we report an *in vitro* model  
50 of the human gut that simultaneously co-differentiates epithelial, stromal, endothelial, neural,  
51 and organized muscle populations.

52  
53  
54

## 55 **Main Text**

56 Human intestinal organoids (HIOs) are three-dimensional structures derived from induced  
57 pluripotent stem cells (iPSCs) that model the human intestine<sup>1</sup> and are powerful tools for  
58 studying human development, physiology and pathophysiology<sup>2-5</sup>. Unlike patient-derived  
59 organoids (also known as enteroids), HIOs possess cells from multiple tissue lineages, including  
60 endoderm-derived epithelial cells and mesoderm-derived mesenchymal cells<sup>1,6</sup>. HIOs are  
61 typically simple structures *in vitro*, lacking complex organization and important cell types crucial  
62 to intestinal function such as neurons, endothelial cells and organized smooth muscle. This  
63 simplicity renders the organoids incapable of recapitulating many functions of the intestine<sup>7</sup>.  
64 Several approaches have been developed to increase HIO complexity, including adding missing  
65 cell types individually or by co-culture, or transplantation into a murine host where they are  
66 vascularized by the host and undergo maturation, developing crypts and villi along with the  
67 muscularis mucosae and outer muscle layers, representing a miniature human intestine<sup>6,8,9</sup>.  
68 Altering growth factors present during differentiation has also been used as a method to induce  
69 additional lineages<sup>10-14</sup>; however, a single, harmonized method to achieve coordinated  
70 differentiation of multiple cell lineages in the same organoid has not previously been reported.

71  
72 Here we leverage recent discoveries that the EGF-family member, EPIREGULIN (REG), is an  
73 important stem cell niche factor in the developing human intestine<sup>15</sup>, and demonstrate that  
74 REG promotes iPSC-derived HIOs containing epithelium, stroma, neurons, endothelial cells,  
75 and organized smooth muscle, similar to the native human intestine. Once transplanted into a  
76 murine host, these cell populations further organize along a crypt-villus axis. We show that  
77 these HIOs can recapitulate important functions of the human intestine as they spontaneously  
78 and rhythmically contract without stimulus, suggesting functional muscle and neuronal  
79 connections, and can be connected to simulated and real circulatory systems, confirming blood  
80 vessel function.

## 81 82 **Results**

### 83 84 ***Generation of human intestinal organoids containing neurons, endothelial cells, and*** 85 ***organized smooth muscle.***

86 The directed differentiation method to generate HIOs from human iPSCs is robust and has been  
87 widely used for over a decade<sup>1,16</sup>. Broadly, this differentiation approach relies on the induction of  
88 a mixed endoderm-mesoderm culture followed by further differentiation into intestinal lineages.  
89 During intestinal lineage differentiation, cells growing in 2-dimensional (2D) culture self-organize  
90 and form 3-dimensional (3D) spheroids that possess cells derived from endoderm and  
91 mesoderm. Spheroids are typically placed in media containing EGF, NOGGIN, and RSPONDIN-  
92 1 (ENR Media) for 3 days, which patterns a proximal, small-intestinal identity<sup>11,17</sup>, and can then  
93 be cultured in media containing only EGF. These organoids have been extensively  
94 characterized by our group and others<sup>1,6,11,18</sup>; single cell RNA-sequencing (scRNA-seq) has  
95 revealed that small populations of neuron-like and endothelial-like cells are present in early  
96 cultures, but these populations are transient<sup>11,19</sup>. Smooth muscle cells can be found in these  
97 organoids, but they are rare, sparsely distributed and unorganized within the HIOs *in vitro*<sup>20</sup>. We  
98 recently reported that EPIREGULIN (REG) is a stem cell niche factor *in vivo* during human  
99 intestinal development, and can replace EGF in tissue-derived intestinal enteroid culture,  
100 leading to improved spatial organization and enhanced differentiation of all epithelial cell  
101 types<sup>15</sup>. A more comprehensive analysis of our previously published scRNA-seq data followed  
102 by validation with fluorescence *in situ* hybridization (FISH), shows that REG is also expressed

103 in the outer longitudinal and circular smooth muscle of the developing human intestine at all  
104 time points examined (Extended Data Fig. 1a-e). Based on these new observations, and our  
105 prior findings that EGF is expressed in the differentiated villus epithelial cells, we hypothesized  
106 that EREG may play a role in mesenchymal patterning and differentiation during intestinal  
107 development.

108  
109 To test if EREG plays a role during HIO differentiation, we followed the previously described  
110 differentiation paradigm (Fig. 1a) up to the spheroid stage<sup>1,16</sup>. Once spheroids are collected and  
111 embedded in Matrigel, they are patterned for 3 days with ENR media, and subsequently  
112 cultured in EGF-only media, at a standard concentration of 100 ng/mL. To determine if EREG  
113 can replace EGF in culture and retain differentiation potential, we cultured spheroids in three  
114 concentrations of EREG (1 ng/mL, 10 ng/mL, 100 ng/mL) and compared this to EGF (1 ng/mL,  
115 10 ng/mL, 100 ng/mL), with a constant concentration of NOGGIN and RSPO1 for the first three  
116 days, before switching to EREG-only or EGF-only media (Fig. 1a).

117  
118 We determined the HIO forming efficiency of each concentration by counting the number of  
119 spheroids plated in a single well at day 0, and again counting the number of HIOs present after  
120 10 days in culture (formula: # of day 10 HIOs/# of day 0 spheroids=forming efficiency).  
121 Experiments were repeated for 3 separate experiments (batches), in 3 different iPSC lines with  
122 3 technical replicates. We saw minimal difference in HIO forming efficiency when comparing  
123 ligand or concentration, with growth in 10 ng/mL EREG having the only statistically significant  
124 increase in forming efficiency across conditions compared to the EGF control cultures  
125 (Extended Data Fig. 2a). We compared morphologic features between the culture conditions,  
126 including area, circularity, roundness, solidity, and aspect ratio. In general, we did not see any  
127 consistent patterns or major differences in these measurements between doses or media  
128 (Extended Data Fig. 2b-f), suggesting all EREG concentrations form HIOs similar in shape and  
129 size as the EGF controls.

130  
131 To characterize HIOs, we subjected all three concentrations of EREG-grown HIOs to scRNA-  
132 seq (Extended Data Fig. 3a-b) and found a cluster enriched with smooth muscle genes (cluster  
133 2: *ACTA2*, *TAGLN*, *ACTG2*, *MYLK*) and 3 clusters with neuroglial identities (clusters 5, 7, and 8:  
134 *S100B*, *PLP1*, *STMN2*, *ELAVL4*); which have been found in rare, transient populations in EGF-  
135 cultured HIOs previously<sup>11,12,18</sup> (Extended Data Fig. 3c). When we plotted cluster abundance per  
136 sample, we found that most of the cells contributing to smooth muscle and neural clusters were  
137 from the EREG samples, with the 1 ng/mL and 10 ng/mL samples having the highest  
138 contributions to these lineages (Extended Data Fig. 3d). The 10 ng/mL EREG condition  
139 possessed both glial and neuronal populations (Extended Data Fig. 3e-f) and featured the most  
140 heterogeneous enteric neuron populations (Extended Data Fig. 3g). Based on the high HIO  
141 forming efficiency (Extended Data Fig. 2a) and the robust neural cell types found within the 10  
142 ng/mL EREG condition, we chose this condition for further characterization.

143  
144 We confirmed the enhanced differentiation of neurons and smooth muscle in EREG culture  
145 compared to EGF culture, across three different experiments, and in three different iPSC lines  
146 using RT-qPCR (Extended Data Fig. 3h). During this validation, we also observed endothelial  
147 gene expression signatures (*CDH5*, *VEGF*) in all 3 biological replicates examined by RT-qPCR  
148 (Extended Data Fig. 3h). Interestingly, no endothelial cells were observed in the whole cell  
149 scRNA-seq data. However, endothelial cells are known to be sensitive to dissociation methods  
150 and are often lost during preparation of samples for whole cell sequencing<sup>21</sup>. Thus, we isolated  
151 nuclei from the 10 ng/mL EREG HIOs and generated single nuclear RNA sequencing (snRNA-  
152 seq) data, which supported the presence of endothelial cells (Fig. 1b-c). Notably, fewer neurons  
153 were present in snRNA-seq data, as previously reported<sup>22,23</sup>. We next validated the presence of

154 neural, endothelial, and smooth muscle lineages with whole mount 3D immunostaining and in  
155 2D sections of HIOs grown in EGF or EREG, and observed that EREG-grown, but not EGF-  
156 grown HIOs, possessed organized SM22<sup>+</sup> (TAGLN<sup>+</sup>) smooth muscle, networks of TUBB3<sup>+</sup> (3D)  
157 and MAP2<sup>+</sup> (2D) neuron-like cells, and PECAM<sup>+</sup> endothelial cells throughout the HIOs (Fig. 1d).

158  
159 ***Transplantation of EREG-HIOs leads to increased maturation and cellular organization.***

160 Murine kidney capsule engraftment is well established as a system to further mature *in vitro*  
161 grown HIOs<sup>2,5,13,20,24,25</sup>. In short, HIOs grown *in vitro* for 28 days or more are surgically placed  
162 under the kidney capsule of immunocompromised NSG mice, where they engraft and grow for  
163 an additional 10-12 weeks. These organoids greatly expand in size, mature to become spatially  
164 organized similar to the native human intestine, have increased cell type diversity, and can be  
165 harvested for snRNA-sequencing and staining<sup>19</sup> (Fig. 2a). To determine if EREG-grown HIOs  
166 could be further matured and become functional, we transplanted 10 ng/mL EREG- or 10 ng/mL  
167 EGF-grown control HIOs beneath the kidney capsule and allowed them to grow for 12 weeks.  
168 Immunofluorescent (IF) staining for epithelial (ECAD) and smooth muscle (TAGLN) markers  
169 revealed that both EGF-transplanted HIOs (tHIOs) and EREG-tHIOs were spatially organized as  
170 previously reported with the development of crypt-villus units and organized smooth muscle  
171 (Fig. 2b). We observed very few neurons or endothelial cells in control EGF-tHIOs (Fig. 2b,  
172 middle panels), while EREG-tHIOs possessed abundant TUBB3<sup>+</sup> neurons and PECAM<sup>+</sup>  
173 endothelial cells spatially organized similar to the native human intestine (Fig. 2b).

174  
175 SnRNA-sequencing of EREG-tHIOs confirmed the presence of epithelial cells, mesenchymal  
176 cells/fibroblasts, smooth muscle, neural cells, and endothelial cells (Fig. 2c-d). We found two  
177 undefined epithelial clusters (clusters 3 and 9) appeared to be mixed gastric and intestinal  
178 epithelium based on mapping to a human fetal endoderm atlas<sup>19</sup> (Extended Data Fig. 4a).  
179 Small portions of undefined or non-intestinal cells have previously been reported in HIOs<sup>19</sup>, and  
180 these cells were excluded from further analysis. To confirm cluster annotations based on marker  
181 gene expression (Fig. 2d), we carried out a label transfer of EREG-tHIO data onto a previously  
182 published fetal intestine reference dataset<sup>26</sup> (Fig. 2e and Extended Data Fig. 1a), and confirmed  
183 the accuracy of annotations based on marker genes. tHIO datasets robustly label transferred  
184 onto their counterparts in the human fetal datasets using Seurat's integrated label transfer  
185 function<sup>27</sup> (Fig. 2e, Extended Data Fig. 4b). To further benchmark tHIO cell type identity against  
186 our reference dataset, we used a cohort of highly enriched genes for each major cell type in the  
187 reference (endothelial, neural, smooth muscle, immune, epithelial, and mesenchymal), that  
188 allowed us to generate a "score" for each cell in the tHIO sample based on the enrichment of  
189 these genes. Cluster 6 contained both proliferating mesenchymal and epithelial cells, so we  
190 excluded it from this analysis for clarity. We found that the annotated tHIO clusters scored highly  
191 for their counterparts in the reference set, further confirming our annotations and the label  
192 transfer findings (Fig. 2f, Extended Data Fig. 4b, Extended Data Table 1). Collectively, this data  
193 suggests the cell types within tHIOs, including endothelial cells and neurons, share  
194 transcriptional states with their analogous cell type within the human intestine.

195  
196 ***EREG-tHIOs exhibit peristaltic-like function.***

197 To test if the neurons and smooth muscle seen within EREG-tHIOs create a functional  
198 neuromuscular unit, we dissected control EGF-tHIOs and EREG-tHIOs into small muscle strips  
199 and explanted them into Krebs's buffer in an organ bath chamber to measure muscle contractile  
200 force, as previously reported<sup>12,28</sup>. Explanted muscle strips were allowed to equilibrate and  
201 monitored continuously for contractions (Fig. 3a). In the absence of any stimulation, we  
202 observed spontaneous and rhythmic contractions in EREG-tHIOs, a phenomenon that was not  
203 seen in control EGF-tHIOs (Fig. 3b). These phasic contractions suggest the presence of  
204 intramuscular interstitial cells of Cajal (ICCs) in EREG-grown tHIOs<sup>12,29</sup>. We stained for the

205 neuronal marker TUBB3 and the ICC marker c-KIT and found that EGF-tHIOs had rare TUBB3<sup>+</sup>  
206 neurons and completely lacked c-KIT<sup>+</sup> ICCs. On the other hand, EREG-tHIOs contained many  
207 c-KIT<sup>+</sup> ICCs directly adjacent to TUBB3<sup>+</sup> neurons, closely resembling the staining pattern found  
208 in the neural plexus of the developing human intestine (Fig. 3c).

209  
210 Next, we treated the organoids with bethanechol, a muscarinic receptor agonist that directly  
211 stimulates muscle contractions, and measured contractile force. No notable change in  
212 contractile force could be measured in control EGF-tHIOs (Fig. 3d – left, grey) while contractile  
213 force increased in a dose-dependent manner in response to bethanechol in EREG-tHIOs (Fig.  
214 3d – right, pink). We then treated the explanted tHIOs with scopolamine, a muscarinic  
215 antagonist that blocks smooth muscle contraction, and were able to trigger significant muscle  
216 relaxation (Fig. 3e - right, pink) in EREG-tHIOs but not in EGF-tHIOs (Fig. 3e – left, grey). With  
217 these data suggesting functional muscle and the presence of neurons in these organoids, we  
218 hypothesized the presence of a functional neuromuscular unit in EREG-tHIOs.

219  
220 To examine if the neuronal populations functionally regulate smooth muscle contractions, we  
221 excited neurons by using the selective  $\alpha 3$ -nicotinic receptor agonist dimethylphenylpiperazinium  
222 (DMPP) to stimulate neurotransmitter release and activate neurons in EREG-grown tHIOs (Fig.  
223 3f). Following DMPP treatment, explants were treated with tetrodotoxin (TTX) to block action  
224 potentials which successfully blocked the neurons' ability to be depolarized again following  
225 another dose of DMPP, thus supporting ENS-dependent contractile activity within the tissue  
226 (Fig. 3g). Finally, we assessed the function of nNOS-expressing neurons by inhibiting them with  
227 NG-nitro-L-arginine methyl ester (L-NAME), and cholinergic neurons by blocking them with a  
228 dose of atropine. We then measured contractile activity following a baseline stimulation, or  
229 stimulation after exposure to either inhibitor (Fig. 3h). Contractile activity was measured as the  
230 change in the area under the curve ( $\Delta$ AUC) immediately before and after each stimulation. After  
231 each inhibitor was added, we saw a significant decrease in muscle relaxation compared to the  
232 uninhibited contractions (Fig. 3h), suggesting nNOS-expressing neurons and cholinergic  
233 neurons elicit smooth contractions in EREG-tHIO explants. These data together demonstrate  
234 EREG-tHIOs not only possess glial, neuronal, and smooth muscle populations but that these  
235 populations are functional and collectively drive peristaltic smooth muscle-like contractions.

236  
237 ***REG-HIOs possess endothelial cells that organize into functional vasculature.***

238 Tissue-specific endothelial cells are a critical cell type in all organs as they not only support the  
239 metabolic demands of a particular organ, but also supply paracrine angiocrine factors that  
240 orchestrate organ development, repair, and regeneration. Corroborating our single nucleus data  
241 (Fig. 1b-c), we used whole mount IF staining to interrogate many individual EREG-HIOs and  
242 consistently observed robust endothelial cells networks throughout the organoids (Fig. 4a-b). As  
243 with the presence of endogenous neurons and smooth muscle structures, we were interested in  
244 understanding if these endothelial cells could form functional vessels.

245  
246 To test their tubulogenic capabilities *in vitro*, we leveraged human 'reset-vascular endothelial  
247 cells' (RVECs) which have been shown to self-assemble into stable, multilayered and branching  
248 perfusable, vascular networks within scalable microfluidic chambers, which are capable of  
249 transporting human blood, and vascularizing colonic enteroids<sup>30</sup> (Fig. 4c). R-VECs are  
250 engineered by transient introduction of the pioneer transcription factor ETV2 into human  
251 endothelial cells, conferring them with the capacity to respond to biophysical and biochemical  
252 signals emanating from the microenvironment, such as intestinal epithelial cells. We  
253 hypothesized that RVECs would adapt and anastomose to the endogenous endothelial cells  
254 within the EREG-HIO, enabling flow through the HIO. To this end, iPSCs labeled with a  
255 lentivirus expressing nuclear mCherry were used to derive mCherry<sup>+</sup> EREG-HIOs. After 14 days

256 in culture, mCherry<sup>+</sup> EREG-HIOs were mixed with GFP-labeled RVECs in a fibrin matrix and  
257 seeded into a microfluidic device. After 48 hours, a tomato lectin dye and PECAM antibody were  
258 flowed through the system to label any vascular networks that had formed<sup>31</sup>. We observed GFP<sup>+</sup>  
259 RVECs anastomosing to mCherry<sup>+</sup>/PECAM<sup>+</sup>/Lectin<sup>+</sup> networks within the EREG-HIOs suggesting  
260 that endogenous endothelial cells were not only able to connect to the RVEC network but that  
261 they formed perfusable vessel-like structures that enabled flow of media and lectin (Fig. 4d).

262  
263 To interrogate the function of endothelial cells within EREG-HIOs *in vivo*, we transplanted  
264 EREG-HIOs under the kidney capsule of a mouse and allowed them to grow for 10 weeks.  
265 These organoids were harvested and co-stained with a human-specific PECAM (hsPECAM)  
266 antibody and a pan-VE-CAD antibody that cross reacts with both human and mouse to confirm  
267 species specificity of observed endothelial cells (Extended Data Fig. 5a). Within EGF-tHIOs, we  
268 noticed only rare human endothelial cells labeled with the hsPECAM antibody. In contrast,  
269 EREG-tHIOs contained abundant hsPECAM labeling (Extended Data Fig. 5b). We also  
270 observed that murine red blood cells autofluoresce in the 488-channel, so we leveraged this  
271 autofluorescence to show that hsPECAM<sup>+</sup> vascular structures within EREG-tHIOs were filled  
272 with mouse red blood cells (Extended Data Fig. 5c), strongly suggesting that EREG-tHIO  
273 endothelial cells anastomose with the host's circulatory system. Based on hsPECAM/VE-CAD  
274 co-labeling, we observed multiple points where a mouse blood vessel (VE-CAD<sup>+</sup>/hsPECAM<sup>neg</sup>),  
275 appeared to connect to a human blood vessel (PECAM<sup>+</sup>/VE-CAD<sup>+</sup>) further suggesting that  
276 EREG-tHIO endothelial cells anastomose with the mouse circulatory system to form functional  
277 vessels (Extended Data Fig. 5d).

278  
279 To directly test a functional connection between the murine and EREG-tHIO vasculature, we  
280 transplanted organoids into a murine host and allowed them to mature for 10 weeks (Fig. 4e).  
281 We then injected the host with tomato-lectin via tail vein injection<sup>30</sup> and allowed the lectin to  
282 circulate for 5 minutes. Organoids were then harvested and whole mount IF stained with the  
283 hsPECAM antibody to delineate between mouse and human endothelial cells (Fig. 4e). Within  
284 EGF-tHIOs, we were only able to find small rare Lectin<sup>+</sup> staining of vascular-like structures,  
285 which were largely hsPECAM-negative, suggesting that most vessels in these tHIOs were host-  
286 derived (Fig. 4f). On the other hand, in EREG-tHIOs, large mCherry<sup>+</sup>/hsPECAM<sup>+</sup>/Lectin<sup>+</sup> vessels  
287 were readily observed (Fig. 4g). Lectin staining in mCherry<sup>+</sup>/hsPECAM<sup>+</sup> structures suggest  
288 these human vessels are connected to the host's circulatory system. To quantify the proportion  
289 of human-specific endothelial cells labeled by lectin, we dissociated these transplanted  
290 organoids after lectin injection and used flow cytometry to determine the proportion of mCherry<sup>+</sup>  
291 human cells that were also positive for a VE-CAD flow antibody (CD144<sup>+</sup>/Lectin<sup>+</sup> in both EGF-  
292 tHIOs and EREG-tHIOs. We found that EREG-tHIOs had a much larger proportion of human  
293 blood vessels labeled with lectin (8.4%) compared to EGF-tHIOs (2.3%) (Fig. 4h and Extended  
294 Data Fig. 6a-b). These data taken together demonstrate EREG-grown HIO's endogenous  
295 endothelial population is able to connect to circulatory systems both *in vitro* and *in vivo* and  
296 have the ability to enable function perfusion to sustain their viability and function.

## 297 298 **Discussion**

299 By leveraging information from the developing human intestine, which allowed us to identify the  
300 developmental niche factor EREG, we have generated the first hPSC-derived human intestinal  
301 organoid model that can simultaneously pattern epithelial, mesenchymal/stromal, neural,  
302 endothelial and smooth muscle populations. By transplanting these organoids into a murine  
303 host, we were able to expand and mature HIOs further in order to assess function. EREG-tHIOs  
304 not only contain neurons and endothelial cell populations, but they also function *in vivo*.  
305 Functional experiments to interrogate smooth muscle contractions strongly support the  
306 development of a functional neuromuscular unit between neural populations and smooth muscle

307 populations; similarly, several lines of evidence support that HIO-derived endothelial cells within  
308 the organoid connect with *in vitro* and *in vivo* circulatory systems, creating vasculature capable  
309 of flow. While our findings are promising, enhancing HIO differentiation with previously missing  
310 lineages, making significant progress towards creating a fully artificial intestine *in vitro*, we note  
311 that there is still room for progress and improvement, given that there are still missing cell types  
312 such as immune and lymphatic lineages, which play critical roles in the intestinal function and  
313 disease.

314  
315 Taken together, our results demonstrate the ability to create more physiologically relevant  
316 culture conditions to pattern complex and accurate organoid models of the human intestine.  
317 This system improves complexity and may enhance the utility of HIOs to understand human  
318 intestinal development, disease modeling, drug screening, and personalized medicine.

## 319 **Methods**

### 320 **Microscopy**

321 All fluorescence images were taken on a Nikon AXR confocal microscope. Acquisition  
322 parameters were kept consistent within the same experiment and all post-image processing was  
323 performed equally across all images of the same experiment. Images were assembled in Adobe  
324 Photoshop CC 2023, and Figures were assembled using Adobe Illustrator CC 2023.

### 325 **Tissue Processing and Staining**

#### 326 *Tissue processing for staining and histology*

327 All tissue or HIOs were placed in 10% Neutral Buffered Formalin (NBF) for 24 hours at room  
328 temperature (RT) on a rocker for fixation. Fixed specimens were then washed 3x in UltraPure  
329 DNase/RNase-Free Distilled Water (Thermo Fisher Cat #10977015) for 30-60 minutes per wash  
330 depending on its size. Next, tissue was dehydrated through a methanol series diluted in  
331 UltraPure DNase/RNase-Free Distilled Water for 30-60 minutes per solution: 25% MeOH, 50%  
332 MeOH, 75% MeOH, 100% MeOH. Tissue was either immediately processed for paraffin  
333 embedding or stored in 100% MeOH at 4°C for future paraffin processing or whole mount  
334 staining. For paraffin processing, dehydrated tissue was placed in 100% EtOH, followed by 70%  
335 EtOH, and perfused with paraffin using an automated tissue processor (Leica ASP300) with 1  
336 hour solution changes overnight. Tissue was then placed into tissue cassettes and base molds  
337 for sectioning. Prior to sectioning, the microtome and slides were sprayed with RNase Away  
338 (Thermo Fisher Cat#700511). 5 µm-thick sections were cut from paraffin blocks onto charged  
339 glass slides. Slides were baked for 1 hour at 60°C in a dry oven and were used within 24 hours  
340 for FISH or within a week for IF. Slides were stored at room temperature in a slide box  
341 containing a silica desiccator packet and the slide box seams were sealed with parafilm.

#### 342 *Antibody, Fluorescence in situ hybridization (FISH) Probes, and dye information*

343 All stains were completed in organoids derived from 3 different stem cell lines, representative  
344 images from one line (iPSC72.3) are reported in this manuscript. The following antibodies were  
345 used throughout the manuscript in immunofluorescence and fluorescent *in situ* hybridization  
346 with co-immunofluorescence staining. All antibodies were used on FFPE processed sections or  
347 whole mount organoids as described below, no frozen sections were used. Rabbit anti-SM22  
348 1:500 (Abcam Cat#ab14106), goat anti-E-Cadherin 1:500 (R&D Systems Cat# AF748), mouse  
349 anti-E-Cadherin 1:500 (BD Transduction Laboratories Cat# 610181), rabbit anti-PECAM 1:200  
350 (Sigma Cat# HPA004690), mouse anti-TUBB3 1:200 (BioLegend Cat# 801201), sheep anti-  
351 SM22 1:500 (Novus Cat# AF7886), chicken anti-MAP2 1:2000 (Abcam Cat#ab92434), goat  
352 anti-VIM 1:200 (R&D Systems Cat#AF2105), rabbit anti-c-KIT 1:500 (Abcam Cat#ab32363) and  
353 mouse anti-VE-CAD 1:1000 (R&D Systems Cat#MAB9381). FISH probes were acquired from  
354 ACDBio and stained using the RNAscope multiplex fluorescent manual protocol and kit.

358 RNAscope Probe Hs-EREG (ACD, Cat# 313081). Tomato lectin dye was purchased from  
359 Thermo Fischer Cat#L32472 and was used 1:1 with sterile PBS for tail vein injections and  
360 diluted 1:100 in Tube media (See “RVEC Experiments” section below for Tube Media  
361 formulation) for RVEC experiments.

362

### 363 *Immunofluorescence (IF) protein staining on 2D paraffin sections*

364 Tissue slides were deparaffinized in Histo-Clear II (National Diagnostics Cat#HS-202) twice for  
365 5 minutes each, followed by rehydration through an ethanol series of two washes each for two  
366 minutes in 100% EtOH, 95% EtOH, 70% EtOH, 30% EtOH, and finally two washes in ddH<sub>2</sub>O  
367 each for 5 minutes. Antigen retrieval was performed using 1X Sodium Citrate Buffer (100mM  
368 trisodium citrate (Sigma, Cat#S1804), and 0.5% Tween 20 (Thermo Fisher Cat#BP337), pH  
369 6.0). Slides were steamed for 20 minutes then washed three times in ddH<sub>2</sub>O for 5 minutes  
370 each. Slides were then incubated in a humidity chamber at room temperature for 1 hour with  
371 blocking solution covering the tissue (5% normal donkey serum (Sigma Cat#D9663) in PBS with  
372 0.1% Tween 20). Slides were then incubated in primary antibody diluted as stated above in  
373 blocking solution at 4°C overnight in a humidity chamber. The next day, slides were washed  
374 three times in 1X PBS for 5 minutes each and incubated with secondary antibody (1:500) with  
375 DAPI (1:1000) diluted in blocking solution for 1 hour at room temperature in a humidity chamber.  
376 Secondary antibodies were raised in donkey and purchased from Jackson Immuno. Slides were  
377 then washed 3x in 1X PBS for 5 minutes each and mounted with ProLong Gold (Thermo Fisher  
378 Cat#P369300). Immunofluorescent stains were imaged within 2 weeks. Stained slides were  
379 stored flat and in the dark at 4°C.

380

### 381 *FISH on 2D paraffin sections*

382 FISH staining protocol was performed according to the manufacturer’s instructions (ACDBio,  
383 RNAscope multiplex fluorescent manual) with a 30 minute protease treatment and a 20 minute  
384 antigen retrieval step. IF protein co-stains were added following the ACDBio FISH protocol.  
385 Briefly, after blocker is applied to the final channel and washed twice in wash buffer, slides were  
386 washed 3x for 5 minutes in PBS followed by the IF protocol stated above from the blocking step  
387 onwards. FISH stains were imaged within a week.

388

### 389 *Whole mount IF with antibody staining*

390 Organoids were removed from Matrigel using a cut P1000 tip and transferred to a 1.5 mL mini-  
391 centrifuge tube. Tubes were spun at 300g for 5 minutes at 4°C and supernatant was removed.  
392 Organoids were fixed in 10% NBF overnight at room temperature on a rocker. The following  
393 day, organoids were washed 3x for 1 hour in organoid wash buffer (OWB) (0.1% Triton, 0.2%  
394 BSA in 1× PBS) at room temperature on a rocker. Organoids were then incubated in CUBIC-L  
395 (TCI Chemicals Cat#T3740) for 24 hours at 37°C. They were then washed 3x in OWB and  
396 permeabilized for 24 hours at 4°C on a rocker with permeabilization solution (5% normal donkey  
397 serum, 0.5% Triton in 1× PBS). After 24 hours of permeabilization, the solution was removed  
398 and the desired primary antibody, diluted in OWB, was added. Organoids were incubated  
399 overnight at 4°C on a rocker. The next day, organoids were washed 3x in OWB for 1 hour per  
400 wash at room temperature on a shaker. Then, secondary antibody was diluted in OWB at 1:500  
401 and added overnight at 4°C wrapped in foil on a shaker. Organoids were then washed again the  
402 following day 3x in OWB at room temperature with the first wash being for 1 hour with DAPI  
403 added at dilution of 1:1,000. The remaining two washes were for 1 hour in OWB only. Organoids  
404 were then transferred to a 96-well imaging plate (Thermo Fisher Cat#12-566-70) and cleared  
405 using enough CUBIC-R to submerge the organoids (TCI Chemicals Cat#T3741). Organoids  
406 remained in CUBIC-R for imaging and whole mount images were imaged within 1 week.

407

### 408 **HIO Cultures**



409 *Stem cell lines and generation of human intestinal organoids (HIOs)*

410 This study includes data from HIOs generated across 3 hPSC lines: Human ES line H9 (NIH  
411 registry #0062, RRID: CVCL\_9773, female) with an mCherry reporter, human iPSC lines  
412 WTC11 (RRID: CVCL\_Y803, male) and 72.3<sup>31</sup>. All experiments using hPSCs were approved by  
413 the University of Michigan Human Pluripotent Stem Cell Research Oversight Committee. All  
414 stem cell and organoid lines were routinely monitored for mycoplasma using the MycoAlert  
415 Mycoplasma Detection Kit (Lonza Cat#LT07-318).

416

417 *Stem cell maintenance and differentiation*

418 Maintenance and differentiation into HIOs were carried out as previously described<sup>1,2,11,16,32,33</sup>.  
419 Cells were kept in a 37°C tissue culture incubator with 5% CO<sub>2</sub> and lines were maintained in  
420 mTeSR Plus cultured media (Stemcell Technologies Cat# 100-1130). Stem cells underwent  
421 directed differentiation into definitive endoderm over a 3-day treatment using Activin A  
422 (100ng/mL, R&D Systems Cat#338-AC) added to RPMI base media. This base media was  
423 supplemented with 0%, 0.2%, 2% HyClone dFBS (Thermo Fischer Cat#SH3007103) on  
424 subsequent days with the addition of 5 mL penicillin-streptomycin each day (Gibco Cat#  
425 15070063). After three days, endoderm monolayers were differentiated into an intestinal identity  
426 by treatment with FGF4<sup>34</sup> (500ng/mL) and CHIR99021 (2µM, APEX BIO Cat#A8396). On days 4-  
427 6 of hindgut differentiation, spheroids budded from the monolayer and were collected. These  
428 spheroids were embedded in Matrigel as previously described<sup>32</sup> and maintained in basal growth  
429 media consisting of Advanced DMEM/F12 (Gibco Cat# 11320033) with B27 (50x, Thermo  
430 Fisher Cat#17504044), GlutaMAX (1X, Gibco Cat#35050061), penicillin-streptomycin (Gibco  
431 Cat# 15070063), and HEPES buffer (15 mM, Gibco Cat#15630080). Organoid basal growth  
432 media was supplemented with epidermal growth factor (EGF) (100 ng/mL, 10 ng/mL, 1 ng/mL  
433 R&D Systems Cat#236-EG-01M) or Epireregulin (EREG) (100 ng/mL, 10 ng/mL, 1 ng/mL R&D  
434 Systems Cat#1195-EP-025/CF) with Noggin-Fc (100ng/mL, purified from conditioned media<sup>35</sup>),  
435 and R-Spondin1 (5% conditioned medium<sup>36</sup>) for the first three days of culture to pattern a  
436 proximal small intestine. On the third day after embedding, media was changed to basal growth  
437 media supplemented with EGF or EREG only (no additional Noggin or R-Spondin1) and  
438 remained in this media for the duration of the experiments with media changes every 5 days.  
439 Organoids were not passaged to avoid disrupting the development and spatial organization of  
440 the key cell types seen in EREG-grown HIOs.

441

442 *HIO forming efficiency assay*

443 Spheroids were collected from three different stem cell lines for three different batches on days  
444 4-6 of hindgut treatment. Spheroids were plated in Matrigel, counted (day 0), and allowed to  
445 grow for 10 days into organoids. After 10 days, organoids were counted and forming efficiency  
446 was calculated by taking the number of organoids that had formed at day 10 and dividing it by  
447 the total number of spheroids collected on day 0.

448

449 *HIO shape and area quantification*

450 To compare shape and area of different HIO conditions, 5 organoids per condition were grown  
451 for 30 days *in vitro* and a 10x bright-field image of each organoid was outlined manually using  
452 the freehand selection tool in ImageJ. Outlines were measured in ImageJ with measurements  
453 set to capture area and shape descriptors including area, solidity, aspect ratio, circularity, and  
454 roundness. This was completed on three stem cell lines and measurements were graphed in  
455 Extended Data Fig. 2.

456

457 *RNA extraction, cDNA synthesis, and RT-qPCR*

458 Three different stem cell lines were used for each experiment with three different organoid  
459 differentiations (batches) and three technical replicates for each batch. mRNA was isolated

460 using the MagMAX-96 Total RNA Isolation Kit/machine (Thermo Fisher Cat#AM1830), and RNA  
461 quality/yield were then measured using a NanoDrop™ One<sup>C</sup> spectrophotometer (Thermo Fisher  
462 Cat#13-400-519) prior to cDNA synthesis. cDNA synthesis was performed using 100 ng of RNA  
463 from each sample leveraging the SuperScript VILO cDNA Kit (Thermo Fisher Cat#11754250).  
464 RT-qPCR was performed on a Step One Plus Real-Time PCR System (Thermo Fisher  
465 Cat#43765592R) with QuantiTect SYBR Green PCR Kit (QIAGEN Cat#204145). Expression of  
466 genes in the measurement of arbitrary units was calculated relative to RN18S using the  
467 following equation and reported in bar graphs for each gene analyzed:  $2^{RN18S(CT) - GENE(CT)} \times$   
468 1,000.

#### 469 *Quantification and statistical analysis (for RT-qPCR etc)*

471 All quantitative experiments were completed in 3 different organoid lines for 3 different batches  
472 with 3 technical replicates per batch. All statistical analysis was performed in GraphPad Prism  
473 Software. See figure legends for number of replicates used, statistical test performed, and the p-  
474 values used to determine the significance for each separate analysis. All t tests were ran two-  
475 tailed, unpaired with welch's correction.

476

#### 477 *Mouse kidney capsule transplantation*

478 The University of Michigan and Cincinnati Children's Hospital Institutional Animal Care and Use  
479 Committees approved all animal research. HIOs were cultured *in vitro* for at least 28 days then  
480 collected for transplantation. HIOs were implanted under the kidney capsules of  
481 immunocompromised NOD-scid IL2Rg-null (NSG) mice<sup>23,25</sup> (Jackson Laboratory strain no.  
482 0005557). Briefly, mice were anesthetized using 2% isoflurane and a left-flank incision was  
483 used to expose the kidney after shaving and sterilization of the area of incision with 3 alternating  
484 washes of hibiclens surgical soap and sterile water to prep the area after shaving. Between 1  
485 and 3 HIOs were then surgically implanted beneath mouse kidney capsules using forceps. Prior  
486 to closure, an intraperitoneal flush of Zosyn (100 mg kg<sup>-1</sup>; Pfizer) was administered. Mice were  
487 administered a dose of analgesic carprofen during the surgery and an additional dose after 24  
488 hours. All mice were monitored daily for 10 days and then weekly until they were euthanized for  
489 retrieval of transplanted HIOs after 10 weeks.

490

#### 491 *tHIO vasculature lectin labeling*

492 HIOs were transplanted into the kidney capsule of a mouse as described above and allowed to  
493 mature for 10 weeks. At 10 weeks, conjugated 647 tomato lectin (Thermo Fischer Cat#L32472)  
494 was mixed 1:1 with sterile PBS and 100 µL was drawn into a 30-gauge insulin needle. Mice  
495 were given a tail vein injection of the diluted lectin and allowed to move about normally for 5  
496 minutes before they were sacrificed for tHIO harvest. tHIOs were immediately placed in 10%  
497 NBF overnight at room temperature on a shaker and the whole mount staining protocol outlined  
498 in the previous section was started the following day.

499

#### 500 *Flow cytometry*

501 After lectin injection outlined in the previous section, tHIOs were harvested and minced with  
502 dissecting scissors. Tissue was then placed into a 15mL conical tube containing 9mL 0.1% (w/v)  
503 filter-sterilized Collagenase Type II (Thermo Fisher Cat#17101015) in 1X PBS and 1mL filter-  
504 sterilized 2.5 units/mL dispase II (Thermo Fisher Cat#17105041) in 1X PBS per gram of tissue.  
505 The tube was incubated at 37°C for 30 minutes with mechanical dissociation every 10 minutes.  
506 After incubation, 75 µL DNase I was added and incubated at 37°C for an additional 30 minutes  
507 with mechanical dissociation every 10 minutes. Following dissociation, 5 mL of isolation media  
508 containing 79% RPMI 1640 (Thermo Fisher Cat#11875093), 20% FBS (Sigma Cat#12103C),  
509 and 100 U/mL penicillin-streptomycin (Thermo Fisher Cat#15140122) were added per 10 mL of  
510 digestion solution. Cells were filtered through 100 µm and 70 µm filters, pre-coated with

511 isolation media, and centrifuged at 500g for 5 minutes at 4°C. The cells were washed by adding  
512 2 mL of FACS buffer and centrifuged at 500g for 5 minutes at 4°C twice. Cells for all control  
513 tubes (unstained, DAPI only, isotype controls, individual antibodies/fluorophores) and  
514 experimental cells were placed into a FACS tube for cell sorting (Corning Cat#352063). Cells  
515 were stained with primary antibody (CD144) diluted 1:50 in FACS buffer (CD144, VE-Cadherin,  
516 anti-human FITC) for 30 minutes at 4°C. Cells were then washed with 5 mL FACS buffer and  
517 centrifuging at 500g for 5 minutes at 4°C for two washes. Cells were resuspended in FACS  
518 buffer and 0.2 µg/mL DAPI was added. FACS was performed using a BD FACS Discovery S8  
519 Cell Sorter and quantitated using the accompanying software.

520

## 521 **Sequencing Experiments**

### 522 *Single cell RNA sequencing dissociation*

523 To dissociate HIOs to single cells, organoids were removed from Matrigel using a cut P1000 tip  
524 and placed in a 1.5 mL micro-centrifuge tube. All consumables such as tubes and pipette tips  
525 used in this prep were pre-washed with 1% BSA in 1X HBSS to prevent adhesion of cells.  
526 Following collection, dissociation enzymes and reagents from the Neural Tissue Dissociation Kit  
527 (Miltenyi Cat#130-092-628) were used, and all incubation steps were carried out in a  
528 refrigerated centrifuge pre-chilled to 10°C unless otherwise stated. Organoids were treated for  
529 15 minutes at 10°C with Mix 1 followed by an incubation for 10 min increments at 10°C with Mix  
530 2. Frequent agitation by pipetting with a P1000 pipette was implemented until organoids were  
531 fully dissociated. Cells were passed through a 70 µm filter coated with 1% BSA in 1X HBSS,  
532 centrifuged at 500g for 5 minutes at 10°C and resuspended in 500 mL 1X HBSS (with Mg<sup>2+</sup>,  
533 Ca<sup>2+</sup>). Cells were centrifuged 500g for 5 minutes at 10°C and washed twice by suspension in 2  
534 mL of HBSS + 1% BSA, followed by more centrifugation. Cells were then counted using a  
535 hemocytometer, centrifuged and resuspended to reach a concentration of 1000 cells/µL and  
536 kept on ice. Single cell libraries were immediately prepared on the 10x Chromium by the  
537 University of Michigan Advanced Genomics Core facility with a target capture of 5000 cells. A  
538 full, detailed protocol of tissue dissociation for single cell RNA sequencing can be found at  
539 <http://www.jasonspencelab.com/protocols>.

540

### 541 *Single nuclei RNA sequencing dissociation*

542 Nuclei were isolated and permeabilized in accordance with 10x Genomics' Chromium Nuclei  
543 Isolation Kit Protocol (10x Genomics Cat#1000493). Briefly, tissue was minced into smaller  
544 fragments and then placed in lysis buffer where it was further dissociated mechanically with a  
545 pellet pestle. Tissue was then incubated in the lysis buffer for 5-7 minutes. The suspension was  
546 passed through the nuclei isolation column and spun at 16,000g for 20 seconds at 4°C. The  
547 suspension was then vortexed for 10 seconds and centrifuged at 500g for 3 minutes at 4°C. The  
548 supernatant was removed, and the pellet was resuspended in 500 µL of Debris Removal  
549 Solution and centrifuged at 700g for 10 minutes at 4°C. The supernatant was removed, and the  
550 pellet was resuspended in 1 mL of Wash Solution and centrifuged at 500g for 5 minutes at 4°C  
551 twice. The final pellet was resuspended in diluted nuclei buffer. Nuclei capture was carried out  
552 on the 10X Chromium platform with a target capture of 5000 nuclei per sample, and libraries  
553 were immediately prepared by the University of Michigan Advanced Genomics Core facility.

554

## 555 **Bioinformatics Analysis**

### 556 *Sequencing library preparation and transcriptome alignment*

557 All single-cell RNA-seq sample libraries were prepared with the 10X Chromium Controller using  
558 v3 chemistry (10X Genomics Cat# 1000268). Sequencing was performed on a NovaSeq 6000  
559 with targeted depth of 100,000 reads per cell. Default alignment parameters were used to align  
560 reads to the pre-prepared human reference genome (hg38) provided by the 10X Cell Ranger

561 pipeline. Initial cell demultiplexing and gene quantification were also performed using the default  
562 10X Cell Ranger pipeline.

563

#### 564 *Sequencing data analysis*

565 To generate cell-by-gene matrices, raw data was processed using the 10X Cell Ranger  
566 package, and sequenced reads were aligned to the human genome hg38. All downstream  
567 analysis was carried out using Scanpy<sup>37</sup> or Seurat<sup>27</sup> (depending on package usage needs). For  
568 primary human tissue sample analysis in Extended Data Fig. 1, we reanalyzed the human  
569 whole cell fetal dataset published in our lab's previous work<sup>10,19,26</sup>. Samples included a 47-day  
570 proximal intestine, a 59-day proximal intestine, two 72-day duodenum, 80-day duodenum and  
571 ileum, an 85-day duodenum, 101-day duodenum and ileum, two 127-day duodenum, 132-day  
572 duodenum. All samples were filtered to remove cells with less than 500 or greater than 10,000  
573 genes, or greater than 60,000 unique molecular identifier (UMI) counts per cell. De-noised data  
574 matrix read counts per gene were log normalized prior to analysis. After log normalization,  
575 highly variable genes were identified and extracted, and batch correction was performed using  
576 the BBKNN algorithm. The normalized expression levels then underwent linear regression to  
577 remove effects of total reads per cell and cell cycle genes, followed by a z-transformation.  
578 Dimension reduction was performed using principal component analysis (PCA) and then  
579 uniform manifold approximation and projection (UMAP) on the top 16 principal components  
580 (PCs) and 30 nearest neighbors for visualization on 2 dimensions. Clusters of cells within the  
581 data were calculated using the Louvain algorithm within Scanpy with a resolution of 1.09. Cell  
582 lineages were identified using canonically expressed genes covering 47,100 intestinal cells from  
583 all samples.

584

585 For Extended Data Fig. 3, all organoid whole cell samples (1 ng/ml EREG, 10 ng/ml EREG, 100  
586 ng/ml EREG, 100 ng/ml EGF) were filtered to remove cells with less than 700 or greater than  
587 6,800 genes, or greater than 33,000 UMI counts per cell, and 0.1 mitochondrial cell counts.  
588 Data matrix read counts per gene were log normalized prior to analysis. After log normalization,  
589 highly variable genes were identified and extracted, no batch correction was needed as these  
590 samples were processed at the same time. Data was then scaled by z-transformation.  
591 Dimension reduction was performed using PCA and then UMAP on the top 10 PCs and 15  
592 nearest neighbors for visualization. Clusters of cells within the data were calculated using the  
593 Louvain algorithm within Scanpy with a resolution of 0.4. The 10 ng/mL EREG sample alone  
594 was filtered to remove cells with less than 700 or greater than 8,000 genes, or greater than  
595 50,000 UMI counts per cell, and 0.1 mitochondrial cell counts. Data matrix read counts per gene  
596 were log normalized prior to analysis. After log normalization, highly variable genes were  
597 identified and extracted. Data was then scaled by z-transformation. Dimension reduction was  
598 performed using PCA and then UMAP on the top 10 PCs and 15 nearest neighbors for  
599 visualization. Clusters of cells within the data were calculated using the Louvain algorithm within  
600 Scanpy with a resolution of 0.4. The 1 ng/mL EREG sample alone was filtered to remove cells  
601 with less than 500 or greater than 8,000 genes, or greater than 45,000 UMI counts per cell, and  
602 0.1 mitochondrial cell counts. Data matrix read counts per gene were log normalized prior to  
603 analysis. After log normalization, highly variable genes were identified and extracted. Data was  
604 then scaled by z-transformation. Dimension reduction was performed using PCA and then  
605 UMAP on the top 10 PCs and 15 nearest neighbors for visualization. Clusters of cells within the  
606 data were calculated using the Louvain algorithm within Scanpy with a resolution of 0.4.

607

608 For Figure 1, 10 ng/ml EREG single nuclei dataset from *in vitro* grown HIOs was first processed  
609 through the standard CellBender<sup>38</sup> workflow to remove ambient RNA introduced in the nuclei  
610 isolation preparation. Then the same dataset was filtered to remove cells with less than 1200 or  
611 greater than 6,000 genes, or greater than 17,500 UMI counts per cell, and 0.1 mitochondrial cell

612 counts. Data matrix read counts per gene were log normalized prior to analysis. After log  
613 normalization, highly variable genes were identified and extracted. Data was then scaled by z-  
614 transformation. Dimension reduction was performed using PCA and then UMAP on the top 18  
615 PCs and 15 nearest neighbors for visualization. Clusters of cells within the data were calculated  
616 using the Louvain algorithm within Scanpy with a resolution of 0.5. For Figure 2, the 10 ng/mL  
617 EREG single nuclei dataset from transplanted HIOs and was first processed through the  
618 standard CellBender<sup>38</sup> workflow to remove ambient RNA introduced in the nuclei isolation  
619 preparation. Then the same dataset was filtered to remove cells with less than 400 or greater  
620 than 8,000 genes, or greater than 30,000 UMI counts per cell, and 0.2 mitochondrial cell counts.  
621 Data matrix read counts per gene were log normalized prior to analysis. After log normalization,  
622 highly variable genes were identified and extracted. Data was then scaled by z-transformation.  
623 Dimension reduction was performed using PCA and then UMAP on the top 15 PCs and 15  
624 nearest neighbors for visualization. Clusters of cells within the data were calculated using the  
625 Louvain algorithm within Scanpy with a resolution of 0.5.

626

#### 627 *Label transfer of tHIO dataset onto human fetal dataset*

628 We utilized Seurat's recommended pipeline to perform single-cell reference mapping using the  
629 same cells as the reference data (human fetal intestine) and query data (tHIOs). PCAs are first  
630 performed on reference and query data. Then a set of anchors are identified and filtered based  
631 on the default setting of the function FindTransferAnchors. With the computed anchors,  
632 reference.reduction parameter set to PCA, and reduction.model set to UMAP, the function  
633 MapQuery returns the projected UMAP coordinates of the query cells mapped onto the  
634 reference UMAP. We then integrated the projected UMAP (colored in red) and the reference  
635 UMAP (colored in light gray) to visualize the result of our reference-based mapping in Fig. 3.

636

#### 637 *Endoderm atlas*

638 Reference map embedding to the Human Fetal Endoderm Atlas<sup>19</sup> to determine off target  
639 lineages was performed using the scoreHIO R Package. tHIO samples were processed  
640 following the preprocessing steps outlined above in the *Single-cell data analysis* section and  
641 then put through the basic workflow outlined for this package to map tHIO cells onto the  
642 reference endodermal organ atlas.

643

#### 644 *Cell scoring analysis*

645 Cells were scored based on expression of the 20 most differentially expressed genes per tissue  
646 type in the human fetal reference dataset. See supplement for gene lists. After obtaining the log-  
647 normalized and scaled expression values for the data set, scores for each cell were calculated  
648 as the average z score within each set of selected genes.

649

#### 650 *tHIO muscle contractions and ENS function*

651 Muscle contraction and ENS function was assayed as previously described<sup>12,39</sup>. Following HIO  
652 transplantation as outlined in the previous section, tHIOs were matured for 10-12 weeks before  
653 harvest. tHIOs were cut into strips ~2 × 6 mm in size and the epithelium mechanically removed  
654 as previously described<sup>12</sup>. No chelation buffer was used, and all manipulations occurred in  
655 oxygenated Krebs's buffer while on ice ((NaCl, 117 mM; KCl, 4.7 mM; MgCl<sub>2</sub>, 1.2mM; NaH<sub>2</sub>PO<sub>4</sub>,  
656 1.2 mM; NaHCO<sub>3</sub>, 25 mM; CaCl<sub>2</sub>, 2.5 mM and glucose, 11 mM), warmed at 37 °C and gassed  
657 with 95% O<sub>2</sub> + 5% CO<sub>2</sub>). These strips were mounted in an organ bath chamber system  
658 (Radnoti) to isometric force transducers (ADInstruments) and contractile activity was  
659 continuously monitored and recorded using LabChart software (ADInstruments). All  
660 measurements were normalized to muscle strip mass. After an equilibrium period, a logarithmic  
661 dose response to Bethanechol (Sigma-Aldrich Cat#C5259) was obtained through the  
662 administration of exponential doses with concentrations of 1 nM to 10 mM at 2 min intervals

663 before the administration of 10  $\mu$ M scopolamine (Tocris Bioscience Cat#1414/1G). After another  
664 equilibrium period, tissue strips were then stimulated with dimethyl phenyl piperazinium (DMPP)  
665 (10  $\mu$ M, Sigma, Cat#D5891). NG-nitro-L-arginine methyl ester (L-NAME) (50  $\mu$ M, Sigma  
666 Cat#N5751) was added 10 minutes before DMPP stimulation to observe the effects of NOS  
667 inhibition. Without washing, atropine sulfate salt monohydrate (Atropine) (1  $\mu$ M, Sigma  
668 Cat#A0132) was then applied 10 minutes prior to a final DMPP stimulation to observe the  
669 cumulative effect of NOS and Ach receptor inhibition. After several washes and an additional  
670 equilibrium period, another dose of DMPP was administered. Neurotoxin tetrodotoxin (TTX) (4  
671  $\mu$ M, Tocris Cat#1078) was added 5 minutes before a final DMPP stimulation and measurement.  
672 Analysis was performed by calculating the integral (expressed as area under the curve, AUC)  
673 immediately before and after stimulation for 60 seconds.

674

## 675 **RVEC Experiments**

### 676 *Culturing and maintenance*

677 RVECs were obtained from Dr. Shahin Rafii's Laboratory at Weill Cornell Medicine and  
678 generated as previously described<sup>29</sup>. Briefly, various multiplicity of infection (MOI) (from 5 to 20)  
679 of lentiviral vectors expressing the transcription factor ETV2 was transduced into human  
680 umbilical vein endothelial cells (HUVECs) to generate R-VECs. Then the transduced ECs that  
681 generated the most functional perfusable and durable vascular network on the microfluidic  
682 devices were selected for further experimentation. We implemented the following protocol to  
683 propagate these cells: RVECs were grown in T75 flasks coated in 0.2% gelatin in Endothelial  
684 Cell (EC) medium which is comprised of 400 ml M199 (Gibco Cat#11150067), 100 ml HyClone  
685 dFBS (Fisher Cat#SH3007103), 5 mL GlutaMAX (1X, Gibco Cat#35050061), 5 mL penicillin-  
686 streptomycin (Gibco Cat# 15070063), 7.5 mL HEPES buffer (15 mM, Gibco Cat#15630080),  
687 Heparin (Sigma Cat#H3149-100KU), FGF2 (10 ng/mL, R&D Cat#233-FB-MTO), IGF1 (10  
688 ng/mL, Preprotech Cat#100-11), EGF (10 ng/mL, R&D Systems Cat#236-EG-01M) and *N*-  
689 acetylcysteine (1.5 mM, Sigma Cat#A9165-25G). The cells were split 1:3 using Accutase  
690 (Corning Cat#MT25058CI) and passaged on gelatin coated flasks.

691

### 692 *Lentiviral labeling*

693 RVECs were transduced with GFP lenti-particles (Lenti-EV-GFP-VSVG) provided by the  
694 University of Michigan Vector Core. Virus was diluted in EC media and added to the RVECs for  
695 8 hours. After RVECs were incubated with the virus, the cells were thoroughly washed and  
696 allowed to continue to grow normally.

697

### 698 *Microfluidic device*

699 Polydimethylsiloxane (PDMS; Sylgard 184; Ellsworth Adhesives Cat#2065622) based  
700 microfluidic devices were fabricated via soft lithography with a 3D printed resin cast. The device  
701 is 50mm in length, 20.64mm in width, and 3mm in height. The physical chamber housing the 3D  
702 co-culture carries a height of 1.5mm to account for larger size HIOs. Each device was plasma  
703 treated, with Harricks Expanded Plasma Cleaner (Harricks Plasma Cat#PDC-001), to a  
704 24x60mm glass cover slip (VWR Cat#152460), and then placed in an 80°C oven for at least 1  
705 hour to finalize a strong adhesion. For long term storage, devices were sealed with parafilm.  
706 Before use, devices were sterilized with UV light for at least 30 minutes prior to seeding of cells.

707

708 RVECs were washed with sterile PBS then incubated in accutase for 3-5 minutes. Digestion  
709 was stopped by adding an equal volume of EC media and cell suspension was obtained by  
710 centrifugation at 500g for 5 minutes at 4°C. Supernatant was removed and RVECs were  
711 resuspended in M199 (Gibco Cat#11150067) and counted. 250,000 RVEC was aliquoted into a  
712 1.5mL micro-centrifuge tube, which corresponds to a single lane on the microfluidic device.

713

714 HIOs were removed from Matrigel using a cut P200 tip and transferred to a 1.5mL micro-  
715 centrifuge tube to be spun at 300g for 5 minutes at 4°C. The supernatant was removed and  
716 resuspended in DMEM. Three to five HIOs were then picked and added to each aliquot of  
717 RVECs in the 1.5mL micro-centrifuge tube, which was subsequently centrifuged at 500g for 5  
718 minutes at 4°C. Supernatant was removed and resuspended in 32uL of a Fibrin mixture  
719 consisting of Fibrinogen from bovine plasma (Sigma Cat#F8630), Human Fibrinogen 1  
720 Plasminogen Depleted (Enzyme Research Lab Cat#FIB-1), and X-Vivo 20 (Lonza Cat#190995).  
721 3.6uL of a Thrombin mixture, consisting of Thrombin from bovine plasma (Sigma Cat#T4648)  
722 and X-Vivo 20, was then added to the mixture of RVECs and Fibrinogen. The final matrix  
723 concentration is 0.5mg/mL of Human Fibrinogen, 2mg/mL of Bovine Fibrinogen, and 2U/mL of  
724 Thrombin. The cell mixture was resuspended and immediately seeded into the microfluidic  
725 chamber within 10-15 seconds. Between loading each lane, devices were flipped upside down  
726 to prevent HIOs resting to the bottom. Devices were then incubated, right side up, for 5-15  
727 minutes.

728  
729 40uL of Tube Media (500mL StemSpan SFEM, Stemcell Technologies Cat#9650; 50mL  
730 Knockout Serum, Gibco Cat#10828010; 5mL Penicillin-Streptomycin, Gibco Cat#15070063;  
731 5mL Heparin, Sigma Cat#H3149; 5mL GlutaMAX, 1X Gibco Cat#15070063; 5mL HEPES  
732 Buffer, Gibco Cat#15630080; 10ng/mL FGF2, R&D Cat#233-FB-MTO; 10ng/mL Aprotinin,  
733 Sigma Cat#A6106) was added to both inlet and outlet. A 1mL syringe, without the plunger, was  
734 additionally attached to both ends and 1mL of Tube media was added to the inlet syringe to  
735 induce shear stress via gravity. Media in the outlet was recycled back to the inlet on a daily  
736 basis.

#### 737 738 **Data and code availability statement**

739 Sequencing data generated and used by this study are deposited at EMBL-EBI ArrayExpress.  
740 Data sets for human fetal intestine (ArrayExpress: E-MTAB-9489,  
741 <https://www.ebi.ac.uk/arrayexpress/experiments/E-MTAB-9489/>, and previously published  
742 work<sup>26</sup>); Data sets for whole cell single cell sequencing of 1 ng/mL, 10 ng/mL, 100 ng/mL EREG  
743 HIOs and 100 ng/mL EGF HIO (ArrayExpress: E-MTAB-13463,  
744 <https://www.ebi.ac.uk/arrayexpress/experiments/E-MTAB-13463/>); Data sets for single nuclear  
745 RNA sequencing of 10 ng/mL HIOs and 10 ng/mL EREG tHIOs (ArrayExpress: E-MTAB-13469,  
746 <https://www.ebi.ac.uk/arrayexpress/experiments/E-MTAB-13469/>). Code used to process raw  
747 data can be found at [https://github.com/jason-spence-lab/Childs\\_2023.git](https://github.com/jason-spence-lab/Childs_2023.git)

#### 748 749 750 **References**

- 751 1. Spence JR, Mayhew CN, Rankin SA, et al. Directed differentiation of human pluripotent  
752 stem cells into intestinal tissue in vitro. *Nature*. 2011;470(7332):105-109.  
753 doi:10.1038/nature09691
- 754 2. Tsai YH, Nattiv R, Dedhia PH, et al. In vitro patterning of pluripotent stem cell-derived  
755 intestine recapitulates in vivo human development. *Development*. 2017;144(6):1045-  
756 1055. doi:10.1242/DEV.138453
- 757 3. Krishnamurthy M, Kechele DO, Broda T, et al. Using Human Induced Pluripotent Stem  
758 Cell-Derived Organoids to Identify New Pathologies in Patients With PDX1 Mutations.  
759 *Gastroenterology*. 2022;163(4):1053-1063.e7. doi:10.1053/J.GASTRO.2022.06.083
- 760 4. McCauley HA, Matthis AL, Enriquez JR, et al. Enteroendocrine cells couple nutrient  
761 sensing to nutrient absorption by regulating ion transport. *Nat Commun*. 2020;11(1).  
762 doi:10.1038/S41467-020-18536-Z
- 763 5. Sarvestani SK, Signs S, Hu B, et al. Induced organoids derived from patients with  
764 ulcerative colitis recapitulate colitic reactivity. *Nat Commun*. 2021;12(1).

- 765 doi:10.1038/S41467-020-20351-5
- 766 6. Finkbeiner SR, Hill DR, Altheim CH, et al. Transcriptome-wide Analysis Reveals  
767 Hallmarks of Human Intestine Development and Maturation In Vitro and In Vivo. *Stem*  
768 *Cell Reports*. 2015;4(6):1140-1155. doi:10.1016/j.stemcr.2015.04.010
- 769 7. Childs CJ, Eiken MK, Spence JR. Approaches to benchmark and characterize in vitro  
770 human model systems. *Development*. 2022;149(20). doi:10.1242/DEV.200641/277169
- 771 8. Cortez AR, Poling HM, Brown NE, Singh A, Mahe MM, Helmraath MA. Transplantation of  
772 human intestinal organoids into the mouse mesentery: A more physiologic and anatomic  
773 engraftment site. *Surgery*. 2018;164(4):643-650. doi:10.1016/J.SURG.2018.04.048
- 774 9. Watson CL, Mahe MM, Múnera J, et al. An in vivo model of human small intestine using  
775 pluripotent stem cells. *Nat Med*. 2014;20(11):1310-1314. doi:10.1038/nm.3737
- 776 10. Capeling MM, Huang S, Childs CJ, et al. Suspension culture promotes serosal  
777 mesothelial development in human intestinal organoids. *Cell Rep*. 2022;38(7):110379.  
778 doi:10.1016/J.CELREP.2022.110379
- 779 11. Holloway EM, Wu JH, Czerwinski M, Capeling MM, Glass I, Correspondence JRS.  
780 Differentiation of Human Intestinal Organoids with Endogenous Vascular Endothelial  
781 Cells. *Dev Cell*. 2020;54:516-528.e7. doi:10.1016/j.devcel.2020.07.023
- 782 12. Workman MJ, Mahe MM, Trisno S, et al. Engineered human pluripotent-stem-cell-derived  
783 intestinal tissues with a functional enteric nervous system. *Nat Med*. 2017;23(1):49-59.  
784 doi:10.1038/NM.4233
- 785 13. Holloway EM, Capeling MM, Spence JR. Biologically inspired approaches to enhance  
786 human organoid complexity. *Development*. 2019;146(8). doi:10.1242/DEV.166173
- 787 14. Schlieve CR, Fowler KL, Thornton M, et al. Neural Crest Cell Implantation Restores  
788 Enteric Nervous System Function and Alters the Gastrointestinal Transcriptome in  
789 Human Tissue-Engineered Small Intestine. *Stem Cell Reports*. 2017;9(3):883-896.  
790 doi:10.1016/J.STEMCR.2017.07.017
- 791 15. Childs CJ, Holloway EM, Sweet CW, et al. EPIREGULIN creates a developmental niche  
792 for spatially organized human intestinal enteroids. *JCI Insight*. 2023;8(6).  
793 doi:10.1172/JCI.INSIGHT.165566
- 794 16. McCracken KW, Howell JC, Wells JM, Spence JR. Generating human intestinal tissue  
795 from pluripotent stem cells in vitro. *Nat Protoc*. 2011;6(12):1920-1928.  
796 doi:10.1038/nprot.2011.410
- 797 17. Múnera JO, Sundaram N, Rankin SA, et al. Differentiation of Human Pluripotent Stem  
798 Cells into Colonic Organoids via Transient Activation of BMP Signaling. *Cell Stem Cell*.  
799 2017;21(1):51-64.e6. doi:10.1016/j.stem.2017.05.020
- 800 18. Yu Q, Kilik U, Holloway EM, et al. Charting human development using a multi-  
801 endodermal organ atlas and organoid models In brief II Charting human development  
802 using a multi-endodermal organ atlas and organoid models. *Cell*. 2021;184:3281-3298.  
803 doi:10.1016/j.cell.2021.04.028
- 804 19. Yu Q, Kilik U, Holloway EM, et al. Charting human development using a multi-  
805 endodermal organ atlas and organoid models. *Cell*. 2021;184(12):3281-3298.e22.  
806 doi:10.1016/j.cell.2021.04.028
- 807 20. Finkbeiner SR, Hill DR, Altheim CH, et al. Transcriptome-wide Analysis Reveals  
808 Hallmarks of Human Intestine Development and Maturation In Vitro and In Vivo. *Stem*  
809 *Cell Reports*. 2015;4(6):1140-1155. doi:10.1016/J.STEMCR.2015.04.010
- 810 21. Koenitzer JR, Wu H, Atkinson JJ, Brody SL, Humphreys BD. Single-nucleus RNA-  
811 sequencing profiling of mouse lung reduced dissociation bias and improved rare cell-type  
812 detection compared with single-cell RNA sequencing. *Am J Respir Cell Mol Biol*.  
813 2020;63(6):739-747. doi:10.1165/RCMB.2020-  
814 0095MA/SUPPL\_FILE/DISCLOSURES.PDF
- 815 22. Tasic B, Yao Z, Graybuck LT, et al. Shared and distinct transcriptomic cell types across



- 816 neocortical areas. *Nature*. 2018;563(7729):72-78. doi:10.1038/S41586-018-0654-5  
817 23. Darmanis S, Sloan SA, Zhang Y, et al. A survey of human brain transcriptome diversity at  
818 the single cell level. *Proc Natl Acad Sci U S A*. 2015;112(23):7285-7290.  
819 doi:10.1073/PNAS.1507125112/-/DCSUPPLEMENTAL
- 820 24. Singh A, Poling HM, Chaturvedi P, et al. Transplanted human intestinal organoids: a  
821 resource for modeling human intestinal development. *Dev*. 2023;150(9).  
822 doi:10.1242/DEV.201416/2792717/DEV201416.PDF
- 823 25. Watson CL, Mahe MM, Múnera J, et al. An in vivo model of human small intestine using  
824 pluripotent stem cells. *Nat Med 2014 2011*. 2014;20(11):1310-1314.  
825 doi:10.1038/nm.3737
- 826 26. Holloway EM, Czerwinski M, Tsai YH, et al. Mapping Development of the Human  
827 Intestinal Niche at Single-Cell Resolution. *Cell Stem Cell*. 2020;28(3).  
828 doi:10.1016/j.stem.2020.11.008
- 829 27. Hao Y, Hao S, Andersen-Nissen E, et al. Integrated analysis of multimodal single-cell  
830 data. *Cell*. 2021;184(13):3573-3587.e29. doi:10.1016/J.CELL.2021.04.048
- 831 28. Eicher AK, Kechele DO, Sundaram N, et al. Functional human gastrointestinal organoids  
832 can be engineered from three primary germ layers derived separately from pluripotent  
833 stem cells. *Cell Stem Cell*. 2022;29(1):36-51.e6. doi:10.1016/J.STEM.2021.10.010
- 834 29. Sanders KM, Koh SD, Ward SM. INTERSTITIAL CELLS OF CAJAL AS PACEMAKERS  
835 IN THE GASTROINTESTINAL TRACT.  
836 <https://doi.org/10.1146/annurev.physiol68040504094718>. 2006;68(18):307-343.  
837 doi:10.1146/ANNUREV.PHYSIOL.68.040504.094718
- 838 30. Palikuqi B, Nguyen DHT, Li G, et al. Adaptable haemodynamic endothelial cells for  
839 organogenesis and tumorigenesis. *Nat 2020 5857825*. 2020;585(7825):426-432.  
840 doi:10.1038/s41586-020-2712-z
- 841 31. Robertson RT, Levine ST, Haynes SM, et al. Use of labeled tomato lectin for imaging  
842 vasculature structures. *Histochem Cell Biol*. 2015;143(2):225-234. doi:10.1007/S00418-  
843 014-1301-3/FIGURES/2

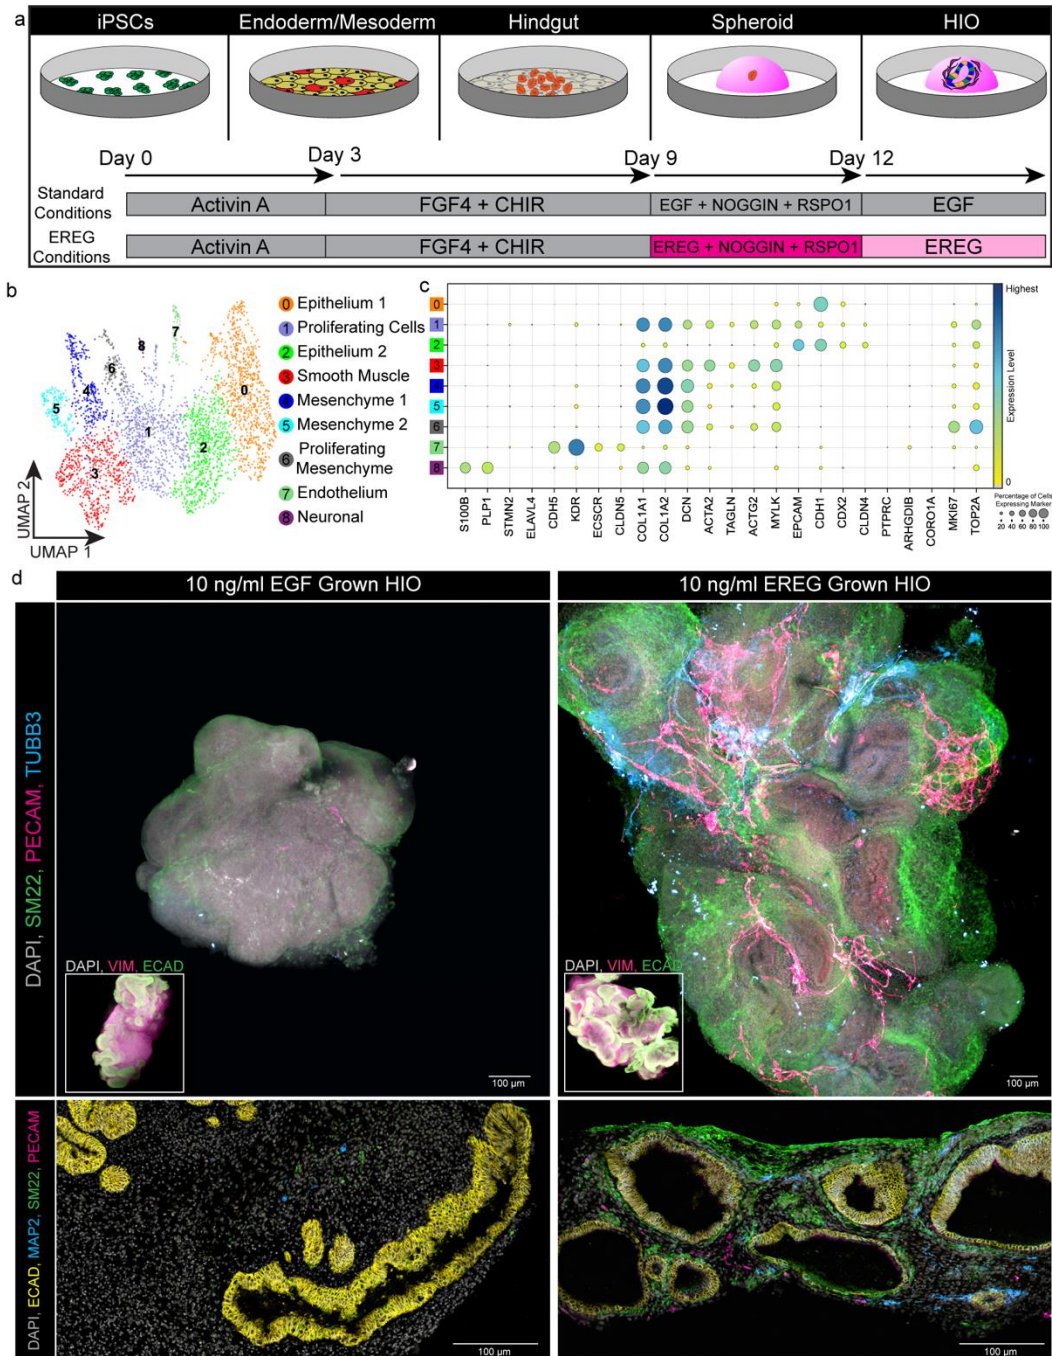

844  
845

846 Figure 1: EREG-HIOs grown *in vitro* spontaneously and simultaneously pattern endothelium,  
847 smooth muscle, and neural components.

- 848 a) Schematic of HIO directed differentiation using standard EGF conditions (grey) and  
849 experimental EREG conditions (pink).  
850 b) UMAP visualization of snRNA-seq from 28-day *in vitro* grown EREG-HIOs in 10 ng/mL  
851 of EREG (n=1 sequencing run of over 20 combined HIOs).  
852 c) Dot plot visualization for expression of canonical markers of neurons (*S100B*, *PLP1*,  
853 *STMN2*, *ELAVL4*), endothelial cells (*CDH5*, *KDR*, *ECSCR*, *CLDN5*), mesenchyme  
854 (*COL1A1*, *COL1A2*, *DCN*), smooth muscle (*ACTA2*, *TAGLN*, *ACTG2*, *MYLK*), epithelium

855 (EPCAM, CDH1, CDX2, CLDN4) immune cells (PTPRC, ARHGDI1, CORO1A) and  
856 proliferative cells (MKI67, TOP2A), in EREG-grown (10 ng/mL) HIOs.  
857 d) Top panels: representative whole mount immunofluorescence (IF) staining of 10 ng/mL  
858 EGF- or EREG-grown HIOs for the presence of smooth muscle (SM22; green),  
859 endothelial cells (PECAM; pink), and neurons (TUBB3; blue). Inlays show IF staining of  
860 mesenchyme (VIM; pink) and epithelium (ECAD; green). Bottom panels: representative  
861 IF staining on 2D sections of EREG-grown (10 ng/mL) and EGF-grown (10 ng/mL) HIOs  
862 for the presence of epithelium (ECAD; green), smooth muscle (SM22; blue), endothelial  
863 cells (PECAM; yellow), and neurons (MAP2; pink). All Scale bars = 100  $\mu$ m.

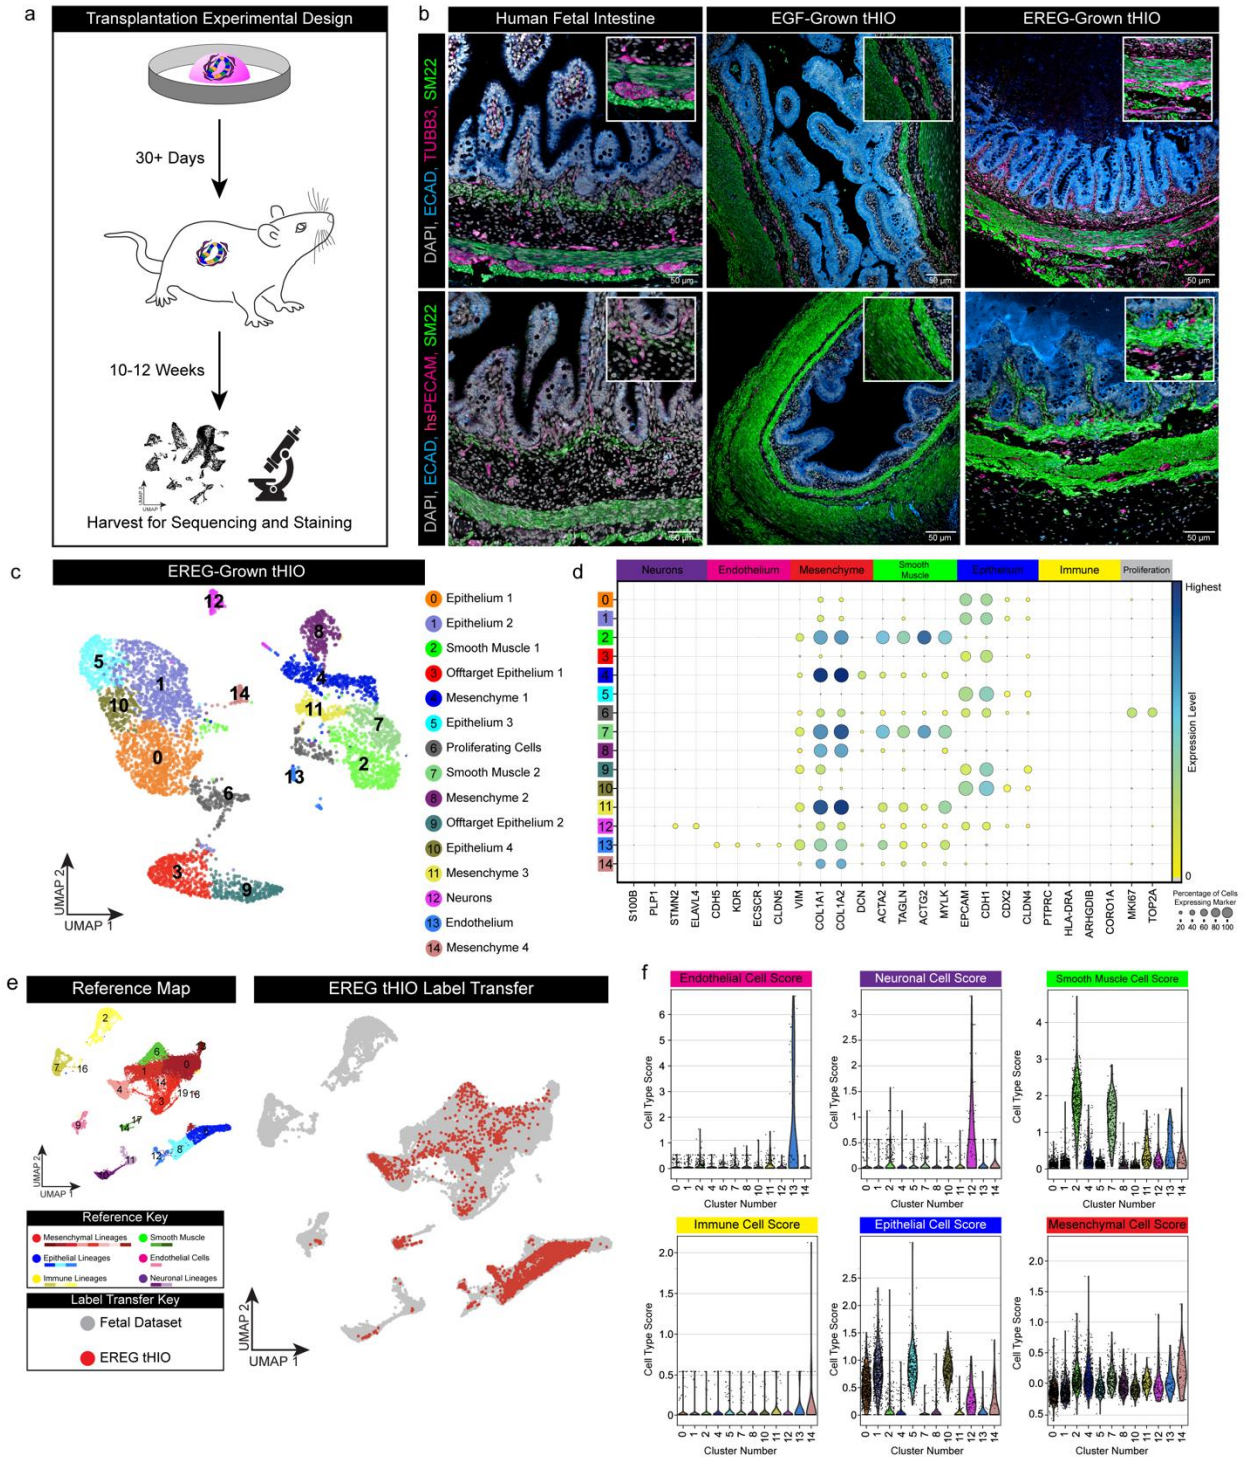

864

865

866

867

Figure 2: EREG-grown HIOs further mature and spatially organize after transplantation into murine kidney capsule.

- 868 a) Schematic timeline of HIO transplantation experiment.  
869 b) Representative IF staining of human fetal intestine (left panel; 127 days post  
870 conception), EGF-grown tHIO (middle panel; 12 weeks), and EREG-grown tHIO (right  
871 panel; 12 weeks) stained for the presence of smooth muscle (SM22; green), epithelium  
872 (ECAD; blue), and neurons (TUBB3; pink) in top panels. Bottom panels show stains for  
873 the presence of smooth muscle (SM22; green), epithelium (ECAD; blue), and endothelial  
874 cells (PECAM; pink). All scale bars = 50  $\mu$ m.  
875 c) UMAP visualization of snRNA-seq of 12-week *in vivo* grown tHIOs in 10ng/mL of EREG  
876 (n=1 sequencing run of one tHIO).  
877 d) Dot plot visualization for expression of canonical markers of neurons (*S100B*, *PLP1*,  
878 *STMN2*, *ELAVL4*), endothelial cells (*CDH5*, *KDR*, *ECSCR*, *CLDN5*), mesenchyme (*VIM*,  
879 *COL1A1*, *COL1A2*, *DCN*), smooth muscle (*ACTA2*, *TAGLN*, *ACTG2*, *MYLK*), epithelium  
880 (*EPCAM*, *CDH1*, *CDX2*, *CLDN4*) immune cells (*PTPRC*, *HLA-DRA*, *ARHGDI3*,  
881 *CORO1A*) and proliferative cells (*MKI67*, *TOP2A*).  
882 e) Left: UMAP visualization of human fetal intestinal data set from Extended Data Fig. 1  
883 recolored for cell type lineages: mesenchymal cells (red), epithelial cells (blue), immune  
884 cells (yellow), smooth muscle cells (green), endothelial cells (pink), and neuronal cells  
885 (purple). Right: UMAP visualization of label transfer results with reference human fetal  
886 intestinal dataset in grey and tHIO dataset in red.  
887 f) Violin plot quantification of cell type scoring for each tissue type in reference intestinal  
888 dataset.

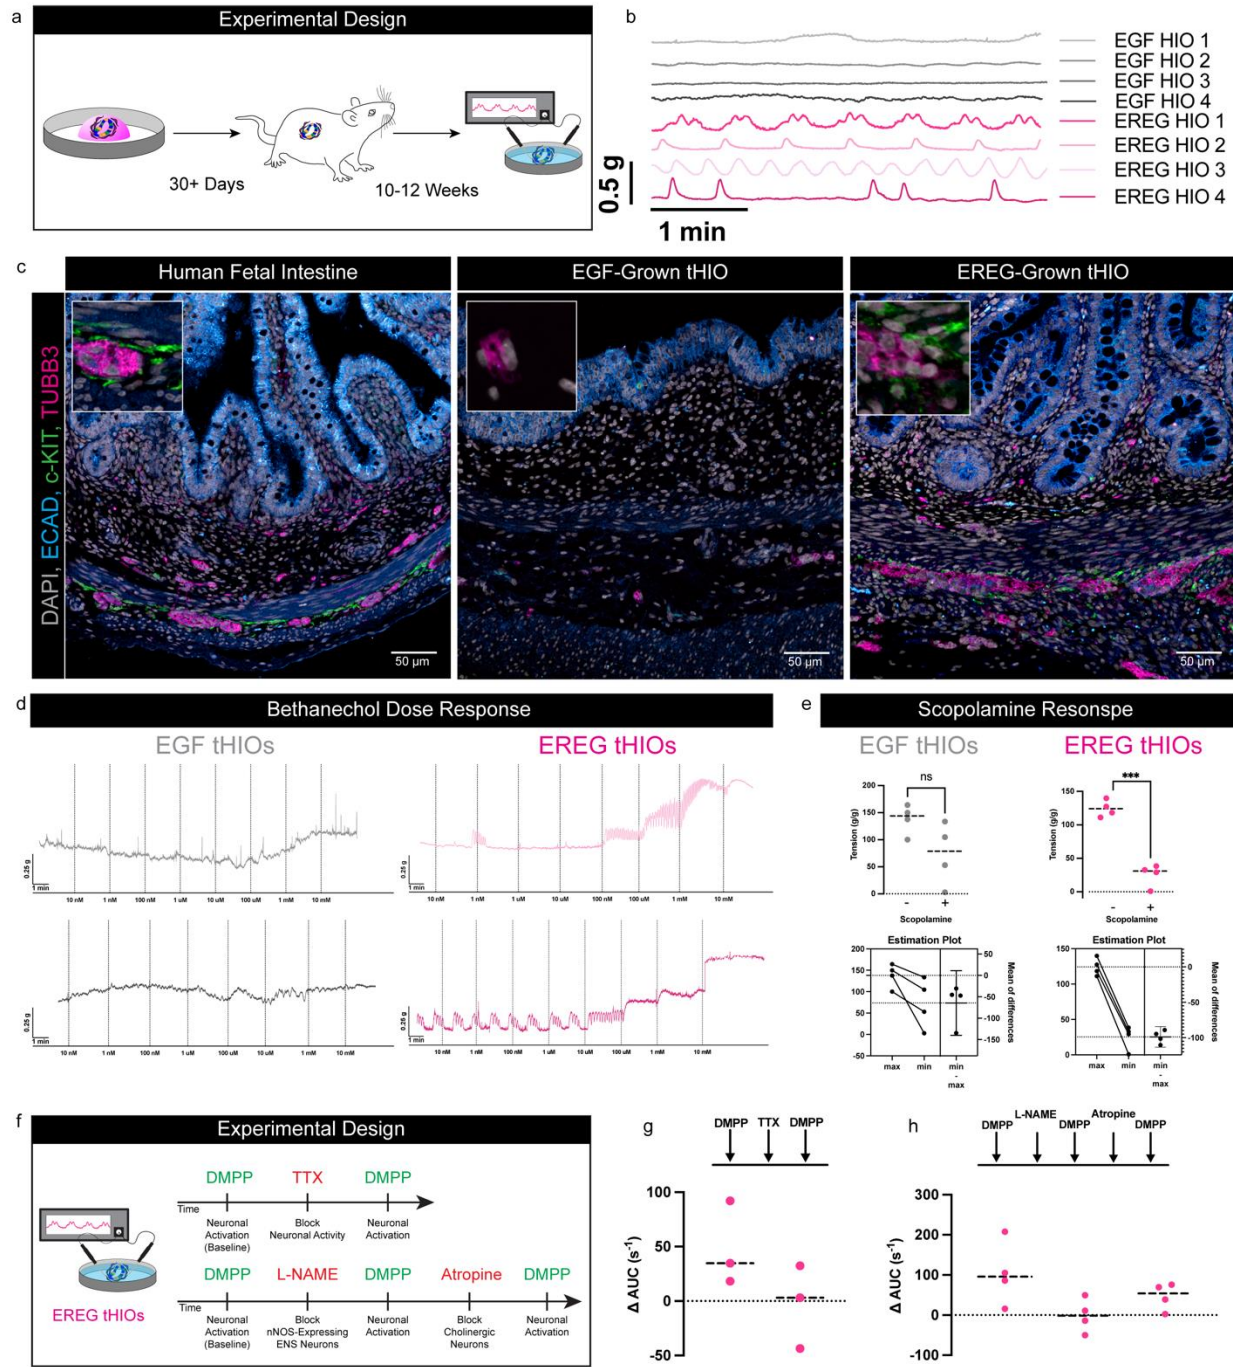

889  
890  
891  
892

- 893 Figure 3: Assessment of EREG-grown tHIOs for neuromuscular units and native functionality.  
894 a) Experimental schematic for transplanting *in vitro* grown HIOs under the kidney capsule  
895 of a murine host and testing muscular and ENS function in an organ bath measured with  
896 isometric-force transducers post-transplant.  
897 b) Isometric force contractions in tissues isolated from n=4 different EGF-grown tHIOs  
898 (grey) and four different EREG-grown tHIOs (pink) after an equilibrium period with no  
899 exogenous contractile triggers.  
900 c) Representative IF staining of human fetal intestine (Left; 127 days post conception),  
901 EGF-grown tHIO (Middle; 12-weeks), EREG-grown tHIO (Right; 12-weeks) stained for  
902 the presence of epithelium (ECAD; blue), general neurons (TUBB3; pink) and ICC's (c-  
903 KIT; green). All scale bars = 50  $\mu$ m.  
904 d) Activation of muscarinic receptor-induced contractions in tissues isolated from n=2 EGF-  
905 grown tHIOs (grey) and n=2 EREG-grown tHIOs (pink) using increasing doses of  
906 bethanechol.  
907 e) Inhibition of the muscarinic receptor with scopolamine induced muscle relaxation.  
908 Graphs show calculated maximum and minimum tissue tension from n=2 EGF-grown  
909 tHIOs (grey) and n=2 EREG-grown tHIOs (pink).  
910 f) Functional test of ENS inhibition using the neurotoxin tetrodotoxin (TTX). Addition of TTX  
911 lowers ENS activation in the presence of DMPP stimulation. Graphed is the change in  
912 AUC following a control DMPP stimulation measured after stimulation, followed by TTX  
913 treatment and a final DMPP stimulation in EREG-grown tHIOs.  
914 g) Functional test of specific ENS neuronal types (nitrenergic and cholinergic) in muscle  
915 contractions. Inhibition using the nitrenergic inhibitor L-NAME and the cholinergic inhibitor  
916 atropine. Graphed is the change in AUC following a control DMPP stimulation measured  
917 after stimulation, followed by L-NAME treatment, another DMPP stimulation, followed by  
918 Atropine treatment, and a final DMPP stimulation in EREG-grown tHIOs.

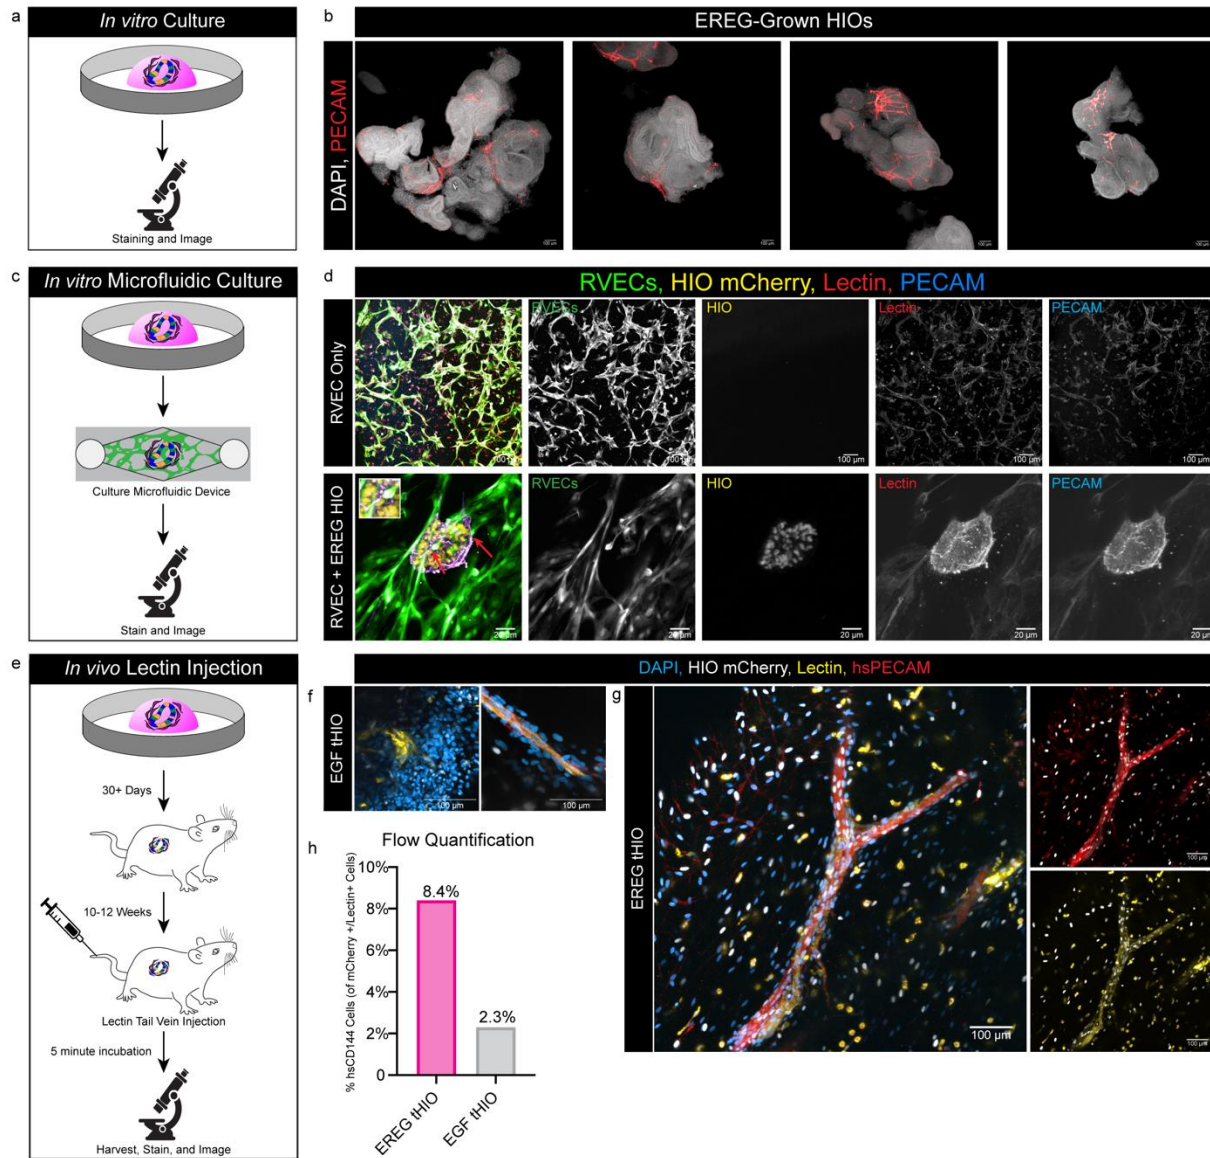

919  
920  
921  
922  
923  
924  
925  
926  
927  
928  
929  
930  
931  
932  
933  
934  
935

Figure 4: EREG-grown HIOs pattern blood vessels that are functional both *in vitro* and *in vivo*.

- Schematic of workflow for whole mount imaging *in vitro* EREG-grown HIOs.
- Representative IF staining of n=4 different EREG-grown (10 ng/mL) HIOs for the presence of endothelial cells (PECAM; red), and DAPI (grey). All scale bars = 100  $\mu$ m.
- Schematic of workflow for *in vitro* EREG-grown HIO functionality test using RVEC microfluidic device.
- Representative IF staining of the control RVEC only microfluidic device lane (top) and the RVEC + EREG-grown (10 ng/mL) HIOs lane. RVECs (green), mCherry<sup>+</sup> HIOs (yellow), lectin dye flow through system (red) and PECAM dye flow through system (blue). Overlap (purple) in HIOs are areas where RVECs connected with endogenous endothelial cells and lectin flow moved through vessels. Control scale bars = 100  $\mu$ m and RVEC + HIO image scale bars = 20  $\mu$ m.
- Schematic of workflow for *in vivo* EREG-grown tHIO functionality test for connection with host vasculature.



- 936 f) Representative whole mount IF staining of EGF-grown (10 ng/mL) tHIOs for the  
937 presence of human endothelial cells (hsPECAM; red), HIO mCherry tag (white), lectin  
938 dye administered through tail vein injection (yellow) and DAPI (blue). All scale bars =  
939 100  $\mu$ m.
- 940 g) Representative whole mount IF staining of EREG-grown (10 ng/mL) tHIOs for the  
941 presence of human endothelial cells (hsPECAM; red), HIO mCherry tag (white), lectin  
942 dye administered through tail vein injection (yellow) and DAPI (blue). All scale bars =  
943 100  $\mu$ m.
- 944 h) Quantification of flow cytometry analysis to quantify the percentage of  
945 hsPECAM<sup>+</sup>/Lectin<sup>+</sup> cells. Three 12-week-old tHIOs per condition were pooled per  
946 condition to ensure enough material for experiment.  
947  
948

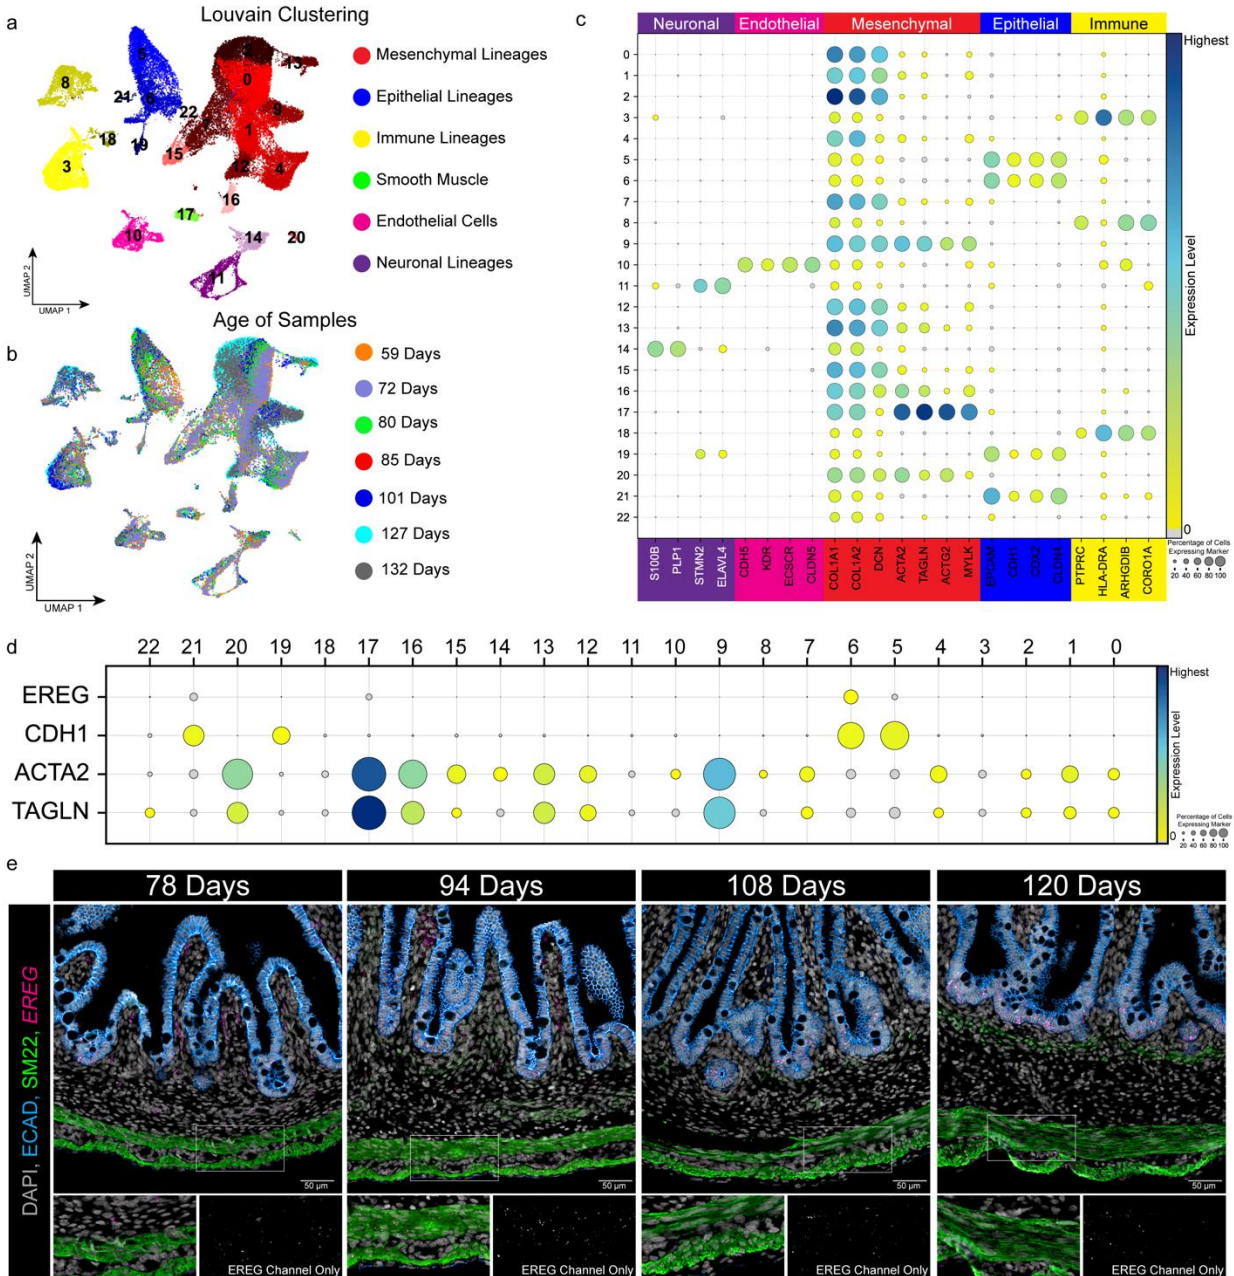

949  
950

951 Extended Data Figure 1: EREG is expressed in the developing human intestine's crypts and  
952 smooth muscle bands across developmental time.

- 953 a) UMAP visualization of Louvain clustering by cell type of human fetal intestine (51,790  
954 cells, n=13 biological samples) for major tissue classifications  
955 b) UMAP visualization of clustering by age of human fetal intestine (n=13 biological  
956 samples. 59-, 72-, 80-, 85-, 101-, 127-, and 132-days post conception).  
957 c) Dot plot of fetal dataset highlighting expression of canonical lineage genes used for  
958 cluster annotation by tissue type.  
959 d) Dot plot of EREG expression in epithelial clusters (marked by CDH1) and smooth  
960 muscle clusters (marked by ACTA2 and TAGLN).

961  
962

e) Co-FISH/IF staining for *EREG* (pink), DAPI (grey), ECAD (blue), and SM22 (green) in the developing human intestine at select timepoints across developmental time.

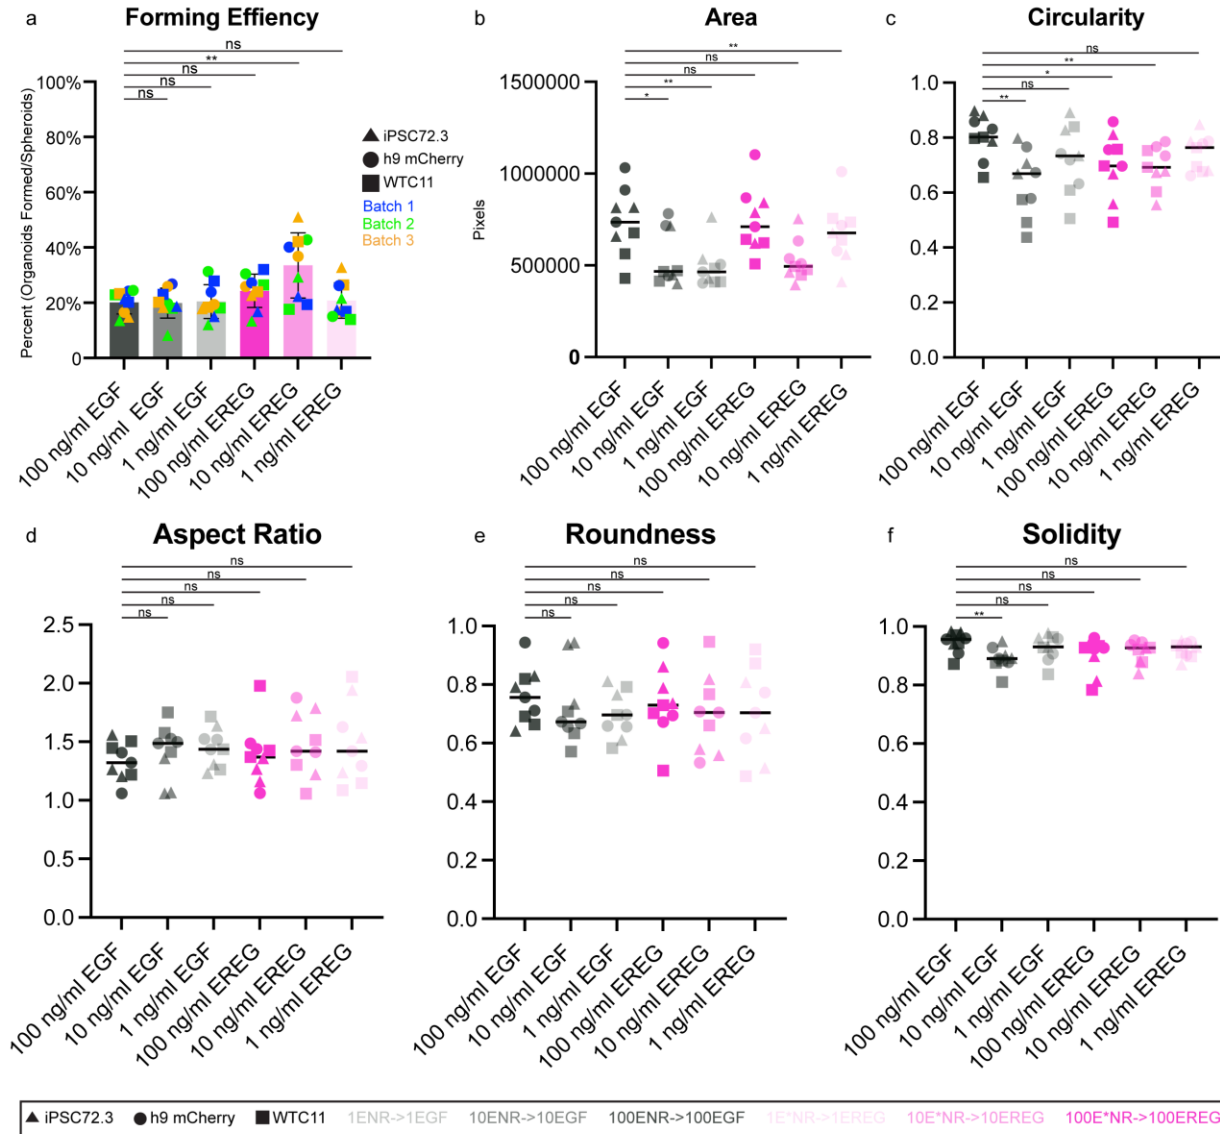

963  
964  
965  
966  
967  
968  
969  
970  
971  
972  
973  
974  
975  
976  
977

Extended Data Figure 2: Measurements of forming efficiency, area, and shape of control EGF-grown HIOs compared to EREG-grown HIOs.

a) Organoid forming efficiency assay results (n = 3 biological replicates with n = 3 technical replicates quantified for three different cell lines). Statistical significance was determined using an unpaired Welch's t test (\*\* - P = 0.0097, ns - P = >0.05).

b-f) Morphologic quantifications including area, solidity, aspect ratio, circularity, and roundness of HIOs grown in varying doses of EGF or EREG. HIOs were derived from three separate cell lines and grown for 30 days. Three HIOs per condition were measured and the ImageJ analysis software was used to calculate these measurements. See methods section for further explanation on calculations. Statistical significance was determined using an unpaired Welch's t test (ns - P = >0.05).

978  
979

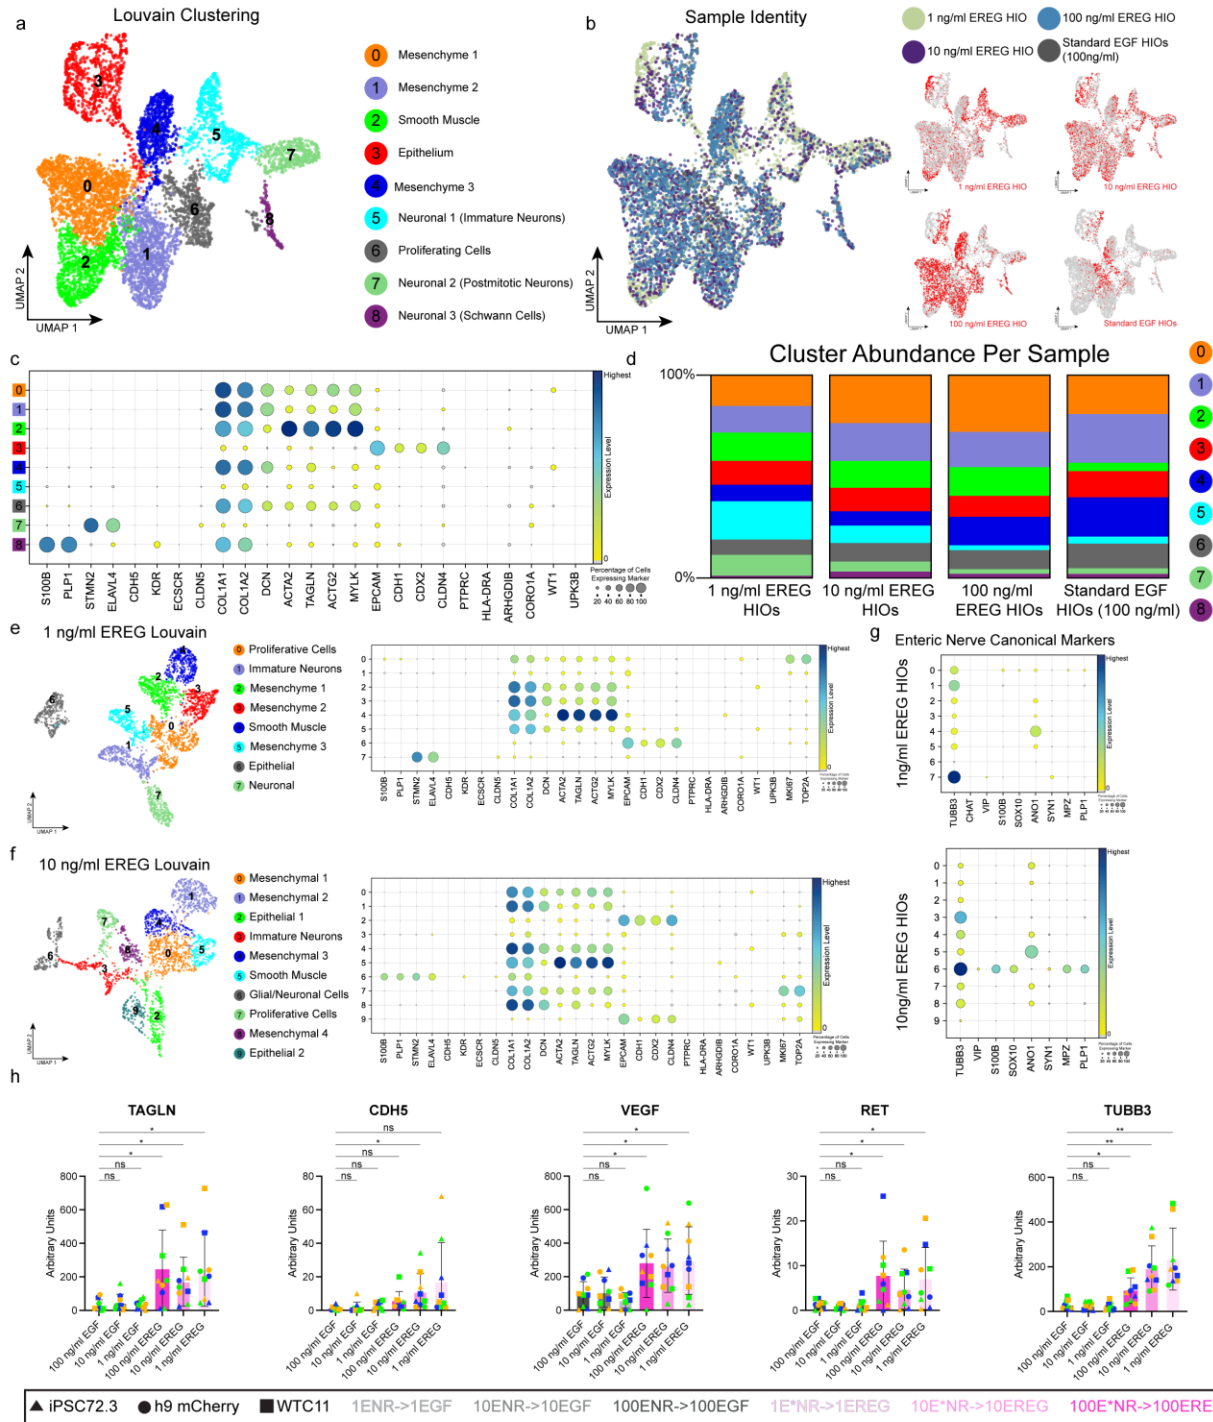

980  
981  
982  
983  
984  
985

Extended Data Figure 3: Gene expression analysis of EREG-grown HIOs show presence of smooth muscle, neural cells, and endothelial cells not seen in control EGF-grown HIOs.

a) UMAP visualization of Louvain clustering by cell type of all HIO samples sequenced (100 ng/mL EREG, 10 ng/mL EREG, 1 ng/mL EREG, and 100 ng/mL EGF).

- 986 b) UMAP visualization of clustering by sample type (100 ng/mL EREG blue, 10 ng/mL  
987 EREG purple, 1 ng/mL EREG green, and 100 ng/mL EGF grey). Inlays break out each  
988 sample (red) individually against rest of dataset (grey).  
989 c) Dot plot of combined HIO dataset highlighting expression of canonical lineage genes  
990 used for cluster annotation.  
991 d) Bar charts showing the cell type abundance (% of total cells) within each cluster for each  
992 sample sequenced. Colors are consistent with the cell type annotation in panel A.  
993 e) UMAP visualization of Louvain clustering by cell type of 1 ng/mL EREG and  
994 accompanying dot plot of expression of canonical lineage genes used for cluster  
995 annotation.  
996 f) UMAP visualization of Louvain clustering by cell type of 10 ng/mL EREG and  
997 accompanying dot plot of expression of canonical lineage genes used for cluster  
998 annotation.  
999 g) Dot plot of individual HIO dataset highlighting expression of major ENS neuronal cell  
1000 types seen in the developing human intestine. Enteric ganglion cells (*TUBB3*, *SYN1*),  
1001 submucosal secretomotor (*VIP*), enteric glial cells (*S100b* - glial network; *SOX10* - EGC  
1002 nuclei), ICC's (*ANO1*), cholinergic neurons (*CHAT*) and Schwann cells (*MPZ*, *PLP1*).  
1003 h) Bar charts showing gene expression of smooth muscle (*TAGLN*), endothelial cells  
1004 (*CDH5*, *VEGF*) and Neurons (*RET*, *TUBB3*) for 100 ng/mL, 10 ng/mL, and 1 ng/mL  
1005 EREG and matched EGF HIOs. Data points shown are the average of triplicates  
1006 completed in 3 different passages (batches) for 3 different cell lines. Statistical  
1007 significance was determined using an unpaired Welch's t test to the standard 100 ng/mL  
1008 EGF condition (ns –  $P = >0.05$ ).  
1009  
1010  
1011  
1012  
1013  
1014  
1015  
1016  
1017  
1018  
1019  
1020  
1021  
1022  
1023  
1024

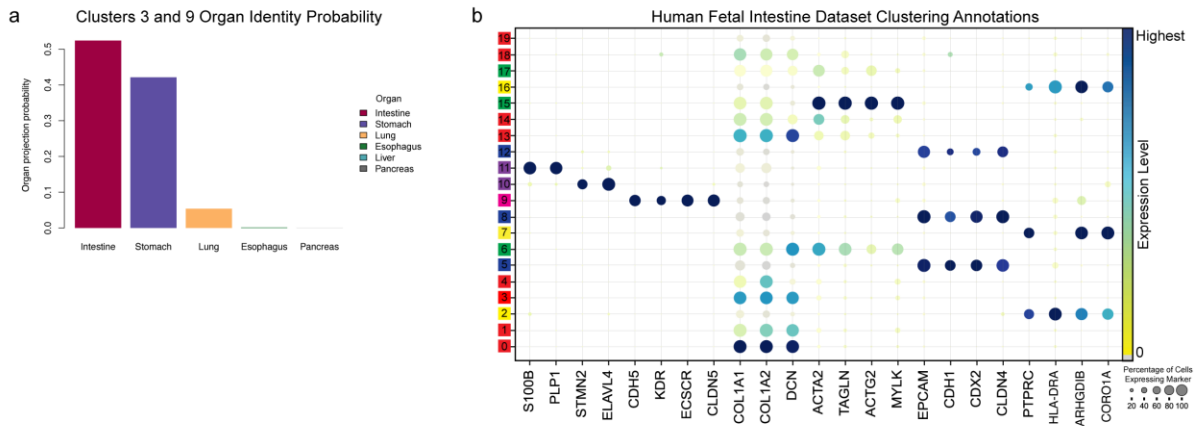

1025  
1026  
1027  
1028  
1029  
1030  
1031  
1032  
1033  
1034  
1035  
1036  
1037  
1038  
1039  
1040  
1041  
1042  
1043  
1044  
1045  
1046

Extended Data Figure 4: EREG-grown tHIO pattern two off target epithelial clusters.

- a) Bar plot of clusters 5 and 7 showing predicted organ identity using the scoreHIO R package. Clustered mapped somewhere between gastric epithelium and intestinal epithelium.
- b) Dot plot of human fetal dataset highlighting expression of canonical lineage genes used for cluster annotation in label transfer and SingleR analysis.

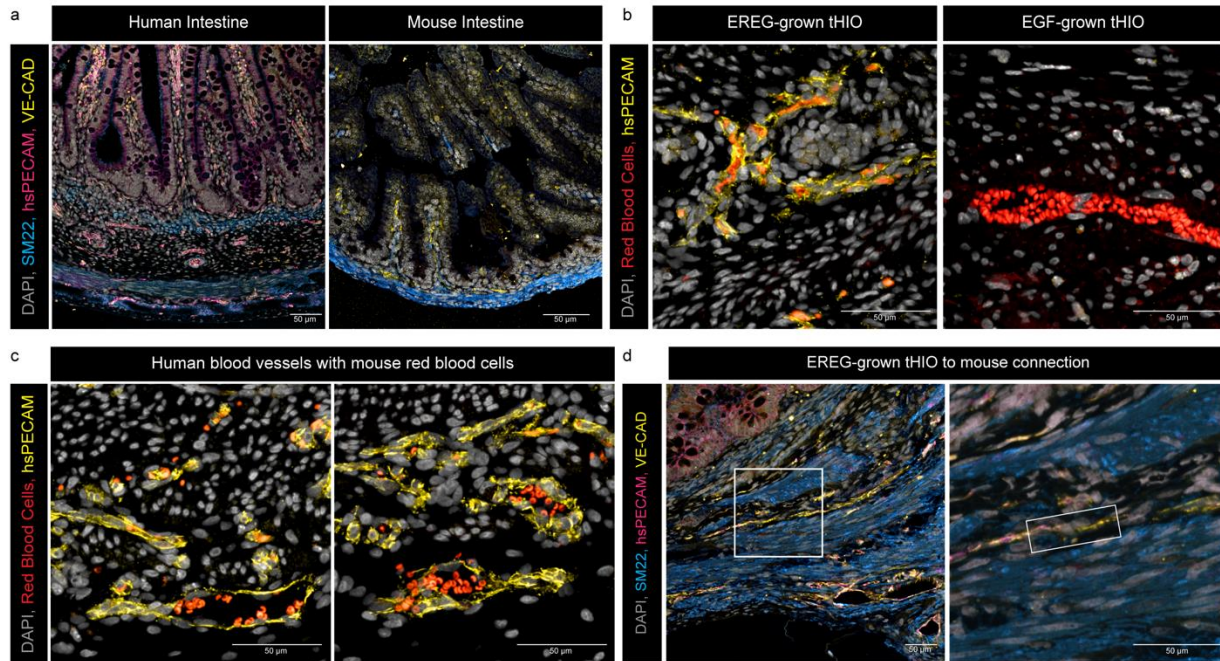

1047  
1048  
1049  
1050  
1051  
1052  
1053  
1054  
1055  
1056  
1057  
1058  
1059  
1060  
1061  
1062  
1063  
1064  
1065

Extended Data Figure 5: EREG-grown thIOs feature human blood vessels that can connect to their murine host.

- a) IF staining of human fetal intestine (Left; 127-days post conception) and E13.5 mouse intestine to test for human specificity of hsPECAM (pink) antibody compared to a pan-species VE-CAD antibody (yellow) and smooth muscle SM22 (blue). All Scale bars = 50 µm.
- b) IF staining of EREG-grown thIO (Left) and EGF-grown thIO (Right) with stains for DAPI (grey), autofluorescent red blood cells in the 488-laser channel (red), and human specific PECAM antibody (yellow). All scale bars = 50 µm.
- c) IF staining of other areas of EREG-grown thIO with stains for DAPI (grey), autofluorescent red blood cells in the 488-laser channel (red), and human specific PECAM antibody (yellow). All Scale bars = 50 µm.
- d) IF staining of EREG-grown thIO vessels (co-stain of hsPECAM in pink with pan-species VE-CAD in yellow) connecting to a mouse blood vessel (stained for only pan-species VE-CAD yellow) with smooth muscle SM22 (blue). All Scale bars = 50 µm.

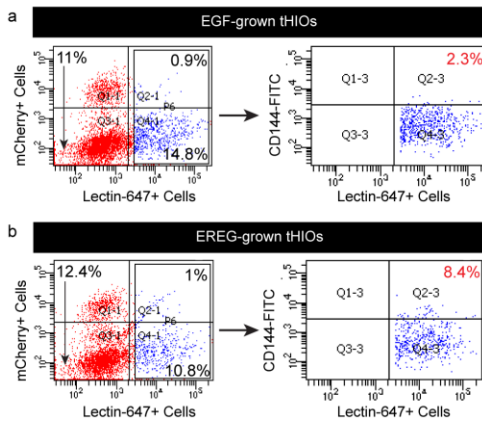

1066  
1067  
1068  
1069  
1070  
1071  
1072  
1073  
1074

Extended Data Figure 6: Flow plots for human specific lectin vessel quantification.

- a) Flow cytometric plots of batch-matched 12-week control EGF-grown HIOs for mCherry tag, human specific CD144/VE-CAD, and Lectin. Flow cytometric analysis required multiple tHIOs to be pooled from the same batch to ensure enough cells for experiment.
- b) Flow cytometric plots of batch-matched 12-week EREG-grown HIOs for mCherry tag, human specific CD144/VE-CAD, and Lectin. Flow cytometric analysis required multiple tHIOs to be pooled from the same batch to ensure enough cells for experiment.
